# Supplementary material for: Comparative epigenetic analysis of tumour initiating cells and syngeneic EPSC-derived neural stem cells in glioblastoma
Source: PubMed Central journal article supplement (PMC8531305; doi:10.1038/s41467-021-26297-6), 2021-10-21
Supplement: 41467_2021_26297_MOESM1_ESM.pdf [file 41467_2021_26297_MOESM1_ESM.pdf]

## Supplementary Information

### **Comparative epigenetic analysis of tumour initiating cells and syngeneic EPSC-derived neural stem cells (SYNGN) in glioblastoma.**

Claire Vinel, Gabriel Rosser, Loredana Guglielmi, Myrianni Constantinou, Nicola Pomella, Xinyu Zhang, James R. Boot, Tania A. Jones, Thomas O. Millner, Anaëlle A. Dumas, Vardhman Rakyan, Jeremy Rees, Jamie L. Thompson, Juho Vuononvirta, Suchita Nadkarni, Tedani El Assan, Natasha Aley, Yung-Yao Lin, Pentao Liu, Sven Nelander, Denise Sheer, Catherine L.R. Merry, Federica Marelli-Berg, Sebastian Brandner and Silvia Marino

#### List of supplementary Tables

Table S1: Clinical and molecular data from the 10 patients of the cohort with IDH-wildtype GBM.

Table S2: 11 genes appearing in both datasets DE and DMR and none of those are shared across all patient-derived cell lines

Table S3 Reagents

#### List of supplementary Data

Supplementary Data 1: Integrated transcriptome and methylome analysis of syngeneic hGIC/iNSC pairs and identification of patient-specific druggable targets (provided separately as an xls file).

#### List of Supplementary Figures

Fig. S1: Comparative analysis of FFPE bulk tumour and matched-GIC culture and validation of tumor-initiating capacity of GIC in vivo.

Fig. S2: Characterisation of EPSC and EPSC-derived NSC at methylome, transcriptome and molecular level.

Fig. S3: Generation and characterization of EPSC-derived iNSC in mice.

Fig. S4: Transcriptomic analysis of EPSC-derived iNSC and endogenous syngeneic and non-syngeneic brain and non-brain cells.

Fig. S5: Comparative transcriptome analysis and signaling pathways deregulation between GIC, their matched-iNSC and non-syngeneic NSC.

Fig. S6: Integration of inferred cell type proportion of the tumour bulk and pathway enrichment in hGIC vs iNSC.

Fig. S7: GAG analysis and modulation of immune cells migration by GIC as compared to iNSC.

Fig. S8: Characterisation of patient-specific drug sensitivity.

Fig. S9: PTGER4 in GBM and GIC and characterization of PGE1-OH treatment in 2D cultures.

Fig. S10: Epigenetic editing of PTGER4 and CO characterization.

Fig. S11: SYNGLICO characterization and analysis of the effect of PGE1-OH treatment on viability and COGFP+ MFI.

Fig. S12: ALDH3B1/DSF treatment characterisation in 2D culture.

Fig. S13: ALDH3B1/DSF treatment characterisation in syngeneic GLICO model.

Fig. S14: NTRK2/CTX characterisation in 2D culture

Fig.S15 NTRK2/CTX treatment characterisation in SYNGLICO

Fig. S16 Gastro-intestinal drug toxicity assay in patient-specific EPSC derived intestinal organoids.

**Table S1: Clinical and molecular data from the 10 patients of the cohort with IDH-wildtype GBM.**

| <b>GBM No.</b> | <b>Histo ID</b> | <b>Sex</b> | <b>Date of surgery</b> | <b>Age at surgery</b> | <b>Location of tumour</b> | <b>Histology Diagnosi s</b>         | <b>IDH1 (R132H IHC)</b> | <b>ATRX</b> | <b>PTEN</b> | <b>EGFR</b> | <b>IDH1</b> | <b>IDH2</b> | <b>Histone mut (H3F3)</b> |
|----------------|-----------------|------------|------------------------|-----------------------|---------------------------|-------------------------------------|-------------------------|-------------|-------------|-------------|-------------|-------------|---------------------------|
| GBM 17         | NH15-1661       | M          | 8/19/2015              | 35                    | Left frontal              | Glioblast oma, <i>IDH</i> wild-type | -                       | Retained    | LOH         | Strong      | -           | -           | -                         |
| GBM 18         | NH15-1877       | M          | 9/17/2015              | 71                    | Frontal                   | Glioblast oma, <i>IDH</i> wild-type | -                       | Retained    | -           | Low         | -           | -           | -                         |
| GBM 19         | NH15-2101       | F          | 10/12/2015             | 65                    | Right parietofrontal      | Glioblast oma, <i>IDH</i> wild-type | -                       | Retained    | -           | -           | -           | -           | -                         |
| GBM 26         | NH16-270        | M          | 2/2/2016               | 64                    | Right frontal             | Glioblast oma, <i>IDH</i> wild-type | -                       | Retained    | -           | Strong      | -           | -           | -                         |
| GBM 30         | NH16-616        | M          | 3/17/2016              | 51                    | Right frontal             | Glioblast oma, <i>IDH</i> wild-type | -                       | Retained    | -           | Strong      | -           | -           | -                         |
| GBM 31         | NH16-677        | F          | 3/22/2016              | 70                    | Right temporal            | Glioblast oma, <i>IDH</i> wild-type | -                       | Retained    | -           | -           | -           | -           | -                         |

|           |               |   |               |    |                   |                                           |   |          |     |          |   |   |   |
|-----------|---------------|---|---------------|----|-------------------|-------------------------------------------|---|----------|-----|----------|---|---|---|
| GBM<br>50 | NH16<br>-2063 | F | 9/6/201<br>6  | 49 | Right<br>frontal  | Glioblast<br>oma, <i>IDH</i><br>wild-type | - | Retained | -   | Strong   | / | - | - |
| GBM<br>52 | NH16<br>-2214 | F | 9/27/20<br>16 | 73 | Right<br>frontal  | Glioblast<br>oma, <i>IDH</i><br>wild-type | - | Retained | LOH | Strong   | - | - | - |
| GBM<br>54 | NH16<br>-2255 | M | 9/30/20<br>16 | 66 | Right<br>parietal | Glioblast<br>oma, <i>IDH</i><br>wild-type | - | Retained | LOH | Moderate |   | - | - |
| GBM<br>61 | NH16<br>-2806 | F | 12/1/20<br>16 | 66 | Right<br>frontal  | Glioblast<br>oma, <i>IDH</i><br>wild-type | - | Retained | LOH | Moderate |   | - | - |

|   |            |
|---|------------|
| - | Negative   |
| / | Not tested |



**Table S2: 11 genes appearing in both datasets DE and DMR and none of those are shared across all patient-derived cell lines analysed**

|                   | DE             |                |                |                  |                  | DMR            |                |                |                           |                           |
|-------------------|----------------|----------------|----------------|------------------|------------------|----------------|----------------|----------------|---------------------------|---------------------------|
|                   | Classification | FDR ESC line 1 | FDR ESC line 2 | logFC ESC line 1 | logFC ESC line 2 | Classification | FDR ESC line 1 | FDR ESC line 2 | Median delta M ESC line 1 | Median delta M ESC line 2 |
| <b>Patient 19</b> |                |                |                |                  |                  |                |                |                |                           |                           |
| <i>CIDEB</i>      | upregulated    | 0.00861        | 0.0025         | 10.5746          | 10.5746          | hypomethylated | 7E-05          | 1.9E-09        | -2.29479                  | -2.87426                  |
| <i>SDR42E1</i>    | upregulated    | 9.6E-06        | 5.2E-08        | 7.89926          | 6.7734           | hypomethylated | 0.00538        | 4.8E-06        | -2.9875                   | -3.16119                  |
| <b>Patient 50</b> |                |                |                |                  |                  |                |                |                |                           |                           |
| <i>HOXB4</i>      | upregulated    | 0.00692        | 0.00871        | 6.7055           | 4.59744          | hypomethylated | 0.00384        | 0.00032        | -2.09186                  | -1.53369                  |
| <b>Patient 54</b> |                |                |                |                  |                  |                |                |                |                           |                           |
| <i>ANKRD6</i>     | upregulated    | 0.00719        | 0.00316        | 2.19287          | 2.21611          | hypomethylated | 0.00661        | 0.00361        | -3.39798                  | -2.91449                  |
| <i>BMPR1B</i>     | Upregulated    | 0.00042        | 0.00036        | 3.99535          | 3.39781          | hypomethylated | 0.00363        | 1.3E-05        | -3.94449                  | -4.34084                  |
| <i>CIDEB</i>      | Upregulated    | 0.00879        | 0.00414        | 9.09057          | 9.09057          | hypomethylated | 0.00075        | 2.5E-08        | -2.84122                  | -3.11284                  |
| <i>DCDC2</i>      | Upregulated    | 6.5E-07        | 4.6E-06        | 5.38218          | 3.74065          | hypomethylated | 0.00363        | 5.2E-06        | -3.94753                  | -3.39403                  |
| <i>HOXA3</i>      | Upregulated    | 0.00175        | 0.00119        | 10.8768          | 5.88029          | hypomethylated | 0.00055        | 1.6E-05        | -2.62662                  | -1.92062                  |
| <i>LRRTM2</i>     | Upregulated    | 3.6E-05        | 1.2E-05        | 6.23953          | 4.76291          | hypomethylated | 0.00324        | 1.9E-08        | -2.8131                   | -3.34121                  |
| <i>NR2F2</i>      | Upregulated    | 0.00019        | 0.00022        | 10.1096          | 5.73603          | hypomethylated | 0.00549        | 0.00323        | -2.50875                  | -1.74077                  |
| <i>NR2F2-AS1</i>  | Upregulated    | 0.00207        | 0.00364        | 9.91577          | 5.10696          | hypomethylated | 0.00549        | 0.00323        | -2.50875                  | -1.74077                  |
| <i>PALMD</i>      | Upregulated    | 1.3E-05        | 1.8E-06        | 7.82612          | 5.62443          | hypomethylated | 0.00363        | 0.00066        | -3.33318                  | -2.74424                  |

Experimental procedures

| <b>PRIMERS</b>                 | <b>SEQUENCE Forward (5'-3')</b> | <b>SEQUENCE Reverse (5'-3')</b>       |
|--------------------------------|---------------------------------|---------------------------------------|
| <i>h/mACTB</i>                 | GCGAGAAGATGACCCAGATC            | CCAGTGGTACGGCCAGAGG                   |
| <i>hSOX2endo</i>               | ACAGCAAATGACAGCTGCAAA           | AAGTCCAGGATCTCTCTCATAAAAGTTT          |
| <i>hPOU5F1endo</i>             | CACTGTACTCCTCGGTCCCTTTC         | CAACCAGTTGCCCAAACCTC                  |
| <i>h/mATP5B</i>                | CCCAGGCTGGTTCAGAGGT             | AGGGGCAGGGTTCAGTCAAG                  |
| <i>hNANOG</i>                  | AGAAAAACAACCTGGCCGAAGAAT        | GTTGAATTGTTCCAGGTCTGGTT               |
| <i>h/mPAX6</i>                 | AACGATAACATACCAAGCGTGT          | GGTCTGCCGTTCAACATC                    |
| <i>h/mGATA6</i>                | GCCAACTGTCACACCACAAC            | TCATAGCAAGTGGTCTGGGC                  |
| <i>h/mGSC</i>                  | ACAACAACACTTCTACGGGC            | CCCACGTTTCATGTAGGGCA                  |
| <i>mGATA6</i>                  | CAGGTCAAGACGGCCTCTAC            | AAGAATCCTGTCGCACGGAG                  |
| <i>mNANOG</i>                  | TTGCTTACAAGGGTCTGCTACT          | ACTGGTAGAAGAATCAGGGCT                 |
| <i>mPOU5F1</i>                 | TAGGTGAGCCGTCTTTCCAC            | GCTTAGCCAGGTTTCGAGGAT                 |
| <i>mSOX2-endo_</i>             | TTAACGCAAAAACCGTGATG            | GAAGCGCCTAACGTACCACT                  |
| <i>hPTGER4</i>                 | CCGGCGGTGATGTTTCATCTT           | CCCACATACCAGCGTGTAGAA                 |
| <i>hNTRK2</i>                  | ATCTCCAACCTCAGACCACCACT         | AATCTGTTTCTCATCTTCCCATACT             |
| <i>h/mGAPDH</i>                | CTGAGGCTCCCACCTTTCTC            | TTATGGGAAAGCCAGTCCCC                  |
| <i>hALDH3B1</i>                | ACAAGTCAGCCTTCGAGTCGG           | AGCACACACAGTTCCCTGC                   |
| <i>h/ALDH1A2</i>               | AAGCTGGGACTGTTTGGATCA           | TACTCCCGCAAGCCAAATTC                  |
| <i>h/ALDH1A3</i>               | ACGGTCTGGATCAACTGCTA            | CCGTCCGATGTTTGGAGGAAG                 |
| <i>h/ALDH1B1</i>               | AGACGGTCACCATCAAGGTT            | AGCATTTCGTCAGGTGGTTG                  |
| <i>h/ALDH1L2</i>               | GCTTTCCAAAGGGGGTTCATC           | GCTAACAGCACAGCTCTTCAT                 |
| <i>h/ALDH2</i>                 | GGGAGAGCCAACAATTCCAC            | CCACTCCCCGACATCTTGTA                  |
| <i>h/ALDH3A1</i>               | ATCGCCTGGGGGAAATTCAT            | AGTCCCGGGATTTCTTAGCA                  |
| <i>h/ALDH3A2</i>               | TTGGTACTTCCCAGGGCTAC            | GGTCAAGTCCTTGAGTCCA                   |
| <i>h/ALDH4A1</i>               | AGCCTCTGGAACCAATGACA            | CACCTGGACGGACAGACAG                   |
| <i>h/ALDH5A1</i>               | GACGAAGCACCTTCCTTTCC            | ATAGCTTCCCAGTGGCTCAA                  |
| <i>h/ALDH6A1</i>               | TCACCGCTTTTGGTTGATCC            | TGTGGGATAAAAGAGGGGGCT                 |
| <i>h/ALDH7A1</i>               | GGTTGCCCTTGGATCTGTTC            | TGAACTTTGCCAGCTCTCT                   |
| <i>h/ALDH9A1</i>               | AGACGACATGACCTGTGTGA            | CCGTTGGATGTCCCTGGTAA                  |
| <i>h/ALDH16A1</i>              | TTCGGATCAGCCCAGGGTTC            | TCAGGCATCAGTCCCCATA                   |
| <i>h/ALDH18A1</i>              | CCTGCAGGGGGTAAATGTTATT          | TCACAGACTGCTGATCTCCG                  |
|                                |                                 |                                       |
| <b>PLASMIDS</b>                | <b>ORIGIN</b>                   | <b>FLUORESCENT REPORTER/SELECTION</b> |
| pCMV-VSVG                      | Addgene, 8454                   | NA                                    |
| pCMV-HIV1                      | Addgene                         | NA                                    |
| Ex-NEG-Lv122                   | GeneCooeia                      | GFP/Puromycin                         |
| EX-Q0086-Lv122                 | GeneCooeia                      | GFP/Puromycin                         |
| shNTRK2                        | Horizon-Dharmacon               | GFP/Puromycin                         |
| pLoxGFP                        | Addgene, 12241                  | FDP                                   |
| FUW-dCas9-Tet1CD-HA-P2A-tagBFP | Addgene, 108246                 | BFP                                   |
| pgRNA-humanized                | Addgene, 44248                  | mCherry/Puromycin                     |

|                                      |                          |                          |
|--------------------------------------|--------------------------|--------------------------|
| <b>LENTIVIRUS</b>                    |                          |                          |
| shALDH3B1                            | Horizon-Dharmacon        | GFP/Puromycin            |
|                                      |                          |                          |
| <b>PLASMID GUIDES</b>                | Forward primer (5'-3')   | Reverse primer (5'-3')   |
| gRNA 1 (g1):<br>TAAAAGGAGTTGGAGTCAGT | TTGGTAAAAGGAGTTGGAGTCAGT | AAACACTGACTCCAACCTCTTTTA |
| gRNA 2 (g2):<br>CATCTAGATCGTGGAAGAGA | TTGGCATCTAGATCGTGGAAGAGA | AAACTCTCTTCCACGATCTAGATG |
| gRNA 3 (g3):<br>AAGAAATAGTACTCCGAG   | AAGAAATAGTACTCCGAG       | TTGGAAGAAATAGTACTCCGAG   |
| gRNA 4 (g4):<br>TTCCCACTCCGCACCTCCGA | TTGGTTCCCACTCCGCACCTCCGA | AAACTCGGAGGTGCGGAGTGGGAA |
| gRNA 5 (g5):<br>CCATTGGCCGGATTGGAAGG | TTGGCCATTGGCCGGATTGGAAGG | AAACCCTTCCAATCCGGCCAATGG |
| gRNA 6 (g6):<br>AGAAAAGTTTGTACAGAGGG | TTGGAGAAAAGTTTGTACAGAGGG | AAACCCTCTGTACAAACTTTTCT  |
|                                      |                          |                          |
| <b>PRIMARY ANTIBODIES</b>            | <b>Reference</b>         |                          |
| Vimentin                             | Abcam ab137321           |                          |
| NANOG                                | Biologend #16H3A38       |                          |
| SOX2                                 | sc-17320                 |                          |
| Oct3/4                               | sc-8628                  |                          |
| SSEA4 AF647                          | BD-560796                |                          |
| TRA 1-60                             | sc-21705                 |                          |
| alpha-fetoprotein                    | R&D-MAB1368              |                          |
| Beta 3 tubulin                       | R&D-MAB1195              |                          |
| alpha-smooth muscle                  | R&D-MAB1420              |                          |
| hNestin                              | R&D MAB5326              |                          |
| mNestin                              | Abcam ab6142             |                          |
| NTRK2                                | Abcam ab33655            |                          |
| PTGER4                               | LS-B6947-1               |                          |
| Chondroitin sulfate (CS-56)          | Abcam ab11570            |                          |
| CD8 AF700                            | Biologend-301028         |                          |
| CD4 PE                               | Biologend-317409         |                          |
| CD25 PE-Cy7                          | Biologend-356108         |                          |
| CD127 APC                            | Biologend-351316         |                          |
| Foxp3 eF450                          | Thermo Fisher-48-4776-42 |                          |
| CD56 FITC                            | Biologend-304603         |                          |
| CD14 Percp Cy5,5                     | eBioscience-45-0149-41   |                          |
| TUJ1                                 | Abcam Ab7751             |                          |
| GFAP                                 | Dako 20025480            |                          |
| Ki67                                 | Abcam ab15580            |                          |
| Cleaved-Caspase3                     | Cell Signaling 9664      |                          |
| Villin                               | Santa Cruz sc58897       |                          |

|                    |                   |  |
|--------------------|-------------------|--|
| E-Cadherin         | BD 610181         |  |
| CDX2               | R&D AF3665        |  |
| NeuN               | ab104225          |  |
| GFP                | Millipore AB16901 |  |
|                    |                   |  |
| <b>COMPOUNDS</b>   | Reference         |  |
| Chondroitinase ABC | Sigma C3667       |  |
| PGE1-OH            | CAY13020          |  |
| Cyclotraxin-B      | Tocris-5062       |  |
| Disulfiram         | Sigma PHR1690     |  |

**a**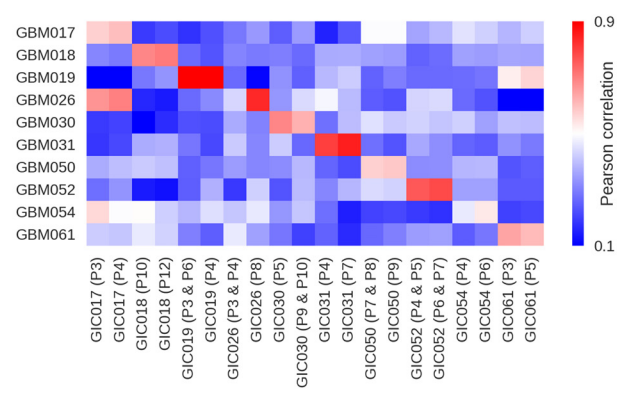**b**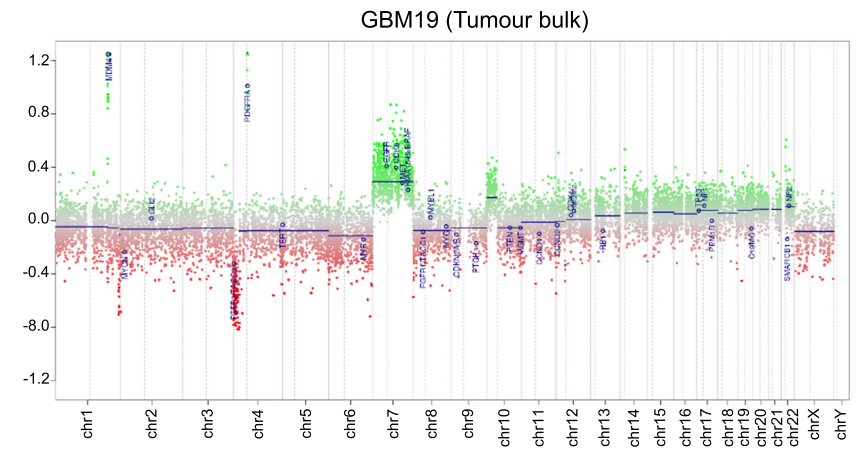**c**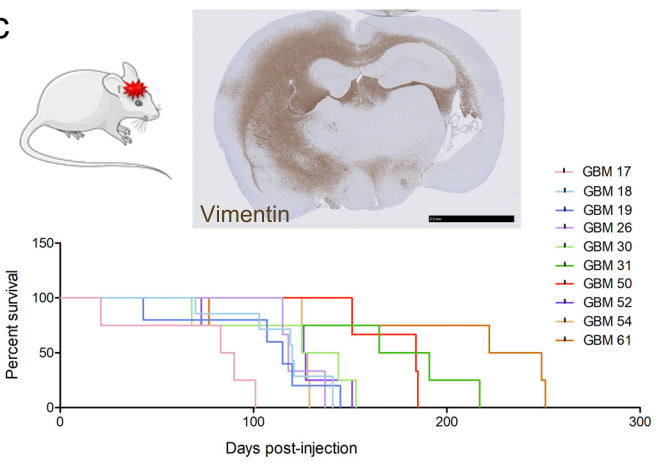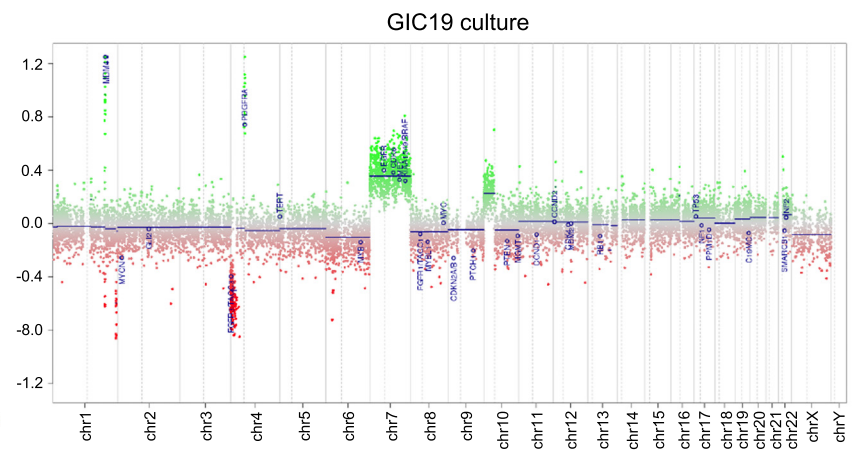

***Fig. S1: Comparative analysis of FFPE bulk tumour and matched-GIC culture and validation of tumor-initiating capacity of GIC in vivo.***

a) Pairwise Pearson correlation heatmap based on the gene expression of GBM bulk tissue versus GIC (Glioblastoma-Initiating Cells). The highest correlation in each row corresponds to the matching GIC line in all but one case (patient 17).

b) Genome wide copy number plot shows matching profiles in GBM-bulk and GIC (patient 19), a representative example is shown here. Green shades indicate amplifications while red indicates deletions.

c) Representative image of xenograft brain tumour tissue stained with human vimentin and survival curves of xenograft models generated from each GIC patient derived line. GIC26 and 50: n=3, GIC30, 31, 17, 52 54 and 61: n=4, GIC19: n=5 and GIC18: n=7 mice were injected per line. 100% of the mice developed tumours.

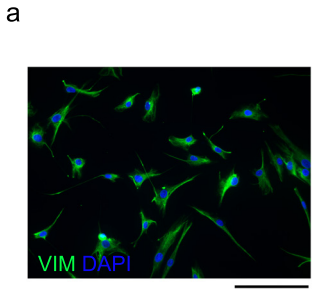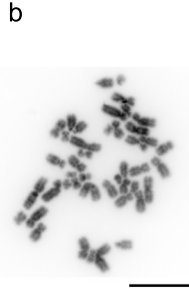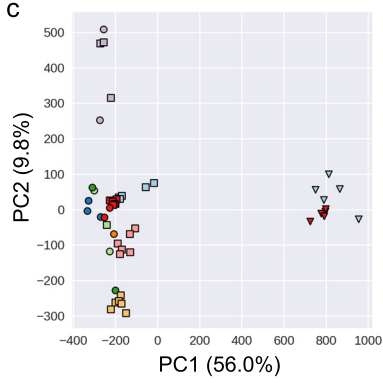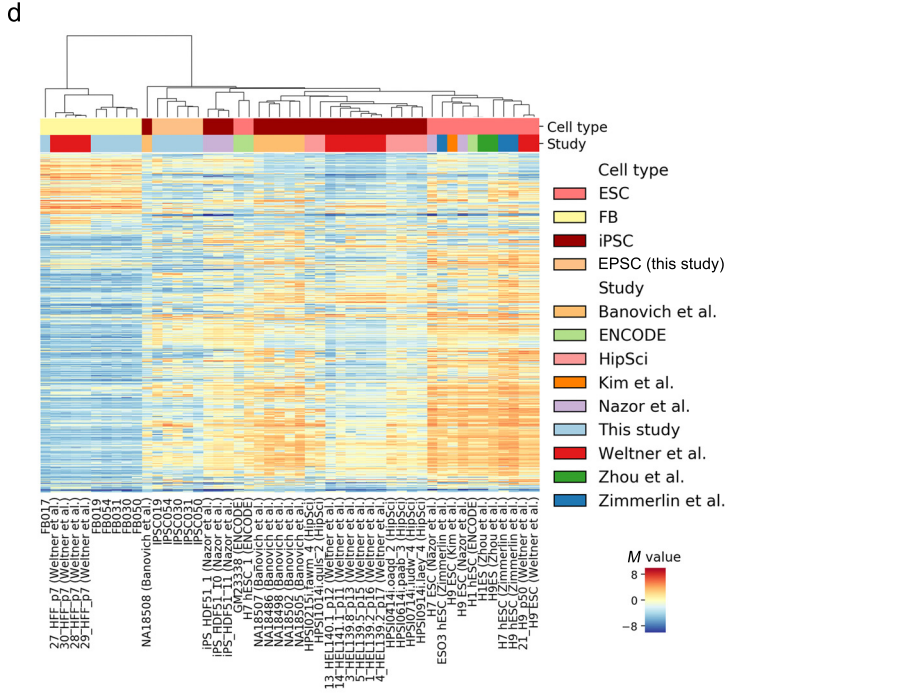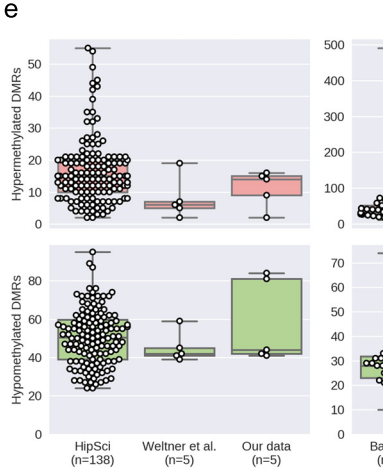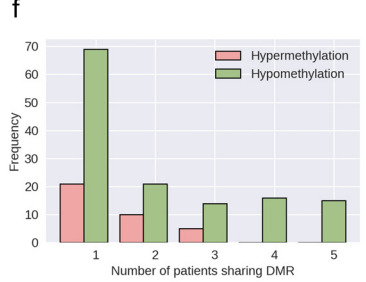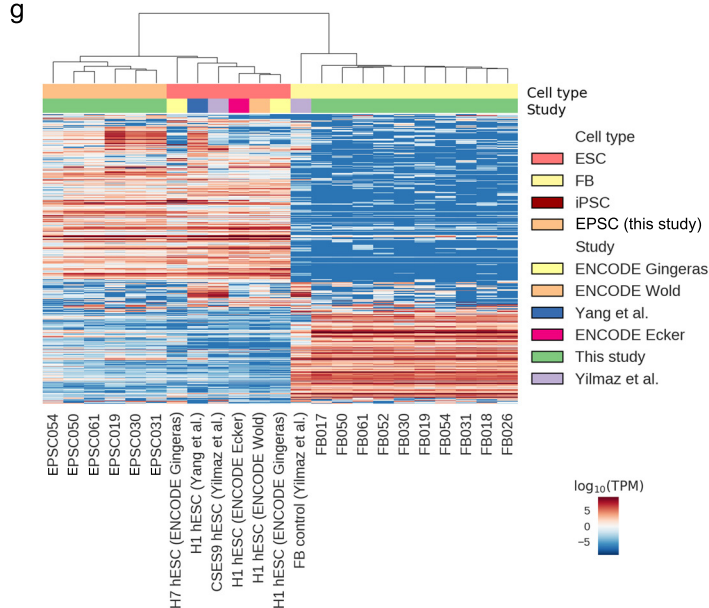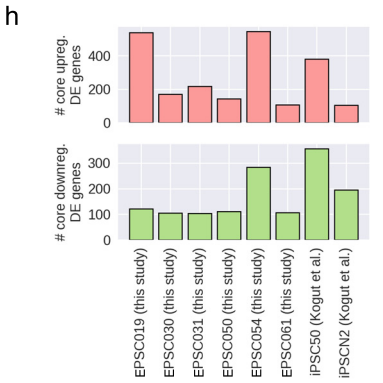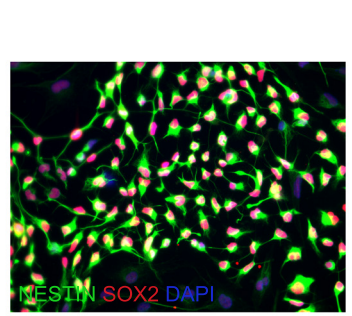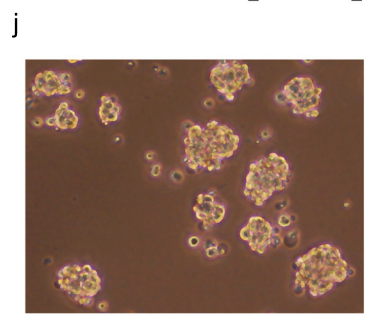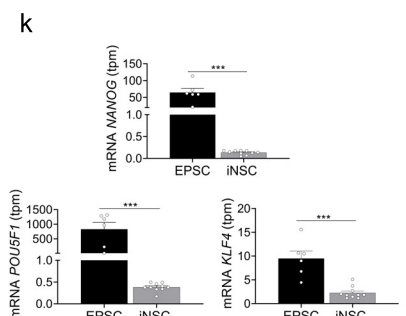

**Fig. S2: Characterisation of EPSC and EPSC-derived NSC at methylome, transcriptome and molecular level.**

a) Human vimentin immunofluorescence (green) staining of fibroblasts isolated from the dura mater. Scale bar is 50  $\mu\text{m}$ . Staining have been performed on the fibroblasts of each of the 10 patients with consistent results.

b) Representative image (iNSC18) of a normal karyotype as assessed on chromosomal spread. Scale bar is 5  $\mu\text{m}$ . Chromosomal spreads have been performed on fibroblasts of each of the 10 patients with consistent results.

c) Principal component analysis plot of the gene expression profiles for our EPSC (Expanded Potential Stem Cells) lines, published reference ESC (Embryonal Stem Cells) and fibroblasts. The first two components are shown.

d) Hierarchical clustering of our EPSC compared to the patient-matched fibroblast of origin and a reference lines on the basis of gene expression from RNA sequencing data.

e) Boxplot showing the number of hyper- and hypomethylated Differentially Methylated Regions (DMRs) identified in different published cohorts of iPSC (induced Pluripotent Stem Cells) lines relative to reference ESC lines. Boxplots show minima and maxima (whiskers), interquartile range (shaded area) and median (horizontal line). Overlaid markers show all data points (some overlapping markers have been removed for visual clarity where n is large). Note that the y axis differs for the Banovich cohort. Each point in the overlaid swarm plot represents a single iPSC line. (HipSci: n=138, Weitner et al: n=5 and our data: n=5 independent lines).

f) Bar chart quantifying the number of hyper- and hypomethylated DMRs identified in our EPSC lines relative to reference ESC separated by the number of patients they present in. Since we consider 5 lines in total, the right most bar refers to DMRs shared between all of them.

g) Hierarchical clustering of the gene expression profiles of our EPSC and fibroblast (FB) lines together with reference ESC datasets on the basis of gene expression from RNA sequencing data.

h) Bar chart quantifying the number of up- and downregulated Differentially Expressed (DE) genes identified in our EPSC lines and reference iPSC lines relative to reference ESC.

i) Co-expression of NESTIN (green) and SOX2 (red) in iNSC (left). Scale bar is 50  $\mu\text{m}$ . Staining have been performed on each of the 10 iNSC lines with consistent results.

j) Formation of neurosphere, representative brightfield image. Scale bar is 50  $\mu\text{m}$ . Experiments have been performed on each of the 10 iNSC lines with consistent results.

k) Expression of pluripotency markers *NANOG*, *POU5F1* and *KLF4* in EPSC (black bars) and iNSC (grey bars). Results are expressed as tpm from the RNA sequencing analysis (n=6 for EPSC and n=10 for iNSC, t test, p value (*NANOG*)<0,0001, p value (*POU5F1*)=0,0003, p value (*KLF4*)<0,0001).



All graphs report mean  $\pm$ SEM. Statistical significance for all panels \* $p \leq 0.05$ , \*\* $p \leq 0.01$ , \*\*\* $p \leq 0.001$ .

Source data are provided in the source data file.



**Fig. S3: Generation and characterization of EPSC-derived iNSC in mice.**

a) Brightfield (top) and immunostaining for vimentin (green, bottom) of fibroblast cultures isolated from dura mater of 3 months old C57Bl6 mice. Scale bar is 20  $\mu\text{m}$ . Staining have been performed on fibroblasts from the 3 mice with consistent results.

b) Heatmap showing mRNA expression of stemness markers (*OCT3/4*, *SOX2*, *NANOG*) and differentiation markers (*GATA6*, *PAX6*, *GSC*) for EPSC (Expanded Potential Stem Cells) colonies normalised on the respective fibroblasts (mice 3, 5, 6) and compared to reference ESC (Embryonal Stem Cells). Squares indicate EPSC with high expression of stemness markers and low expression of the differentiation markers, which were induced into iNSC (induced Neural Stem Cells).

c) Expression of *OCT3/4* (green, top) and *SOX2* (green, bottom), *NANOG* (purple, bottom) in EPSC colonies. Scale bar is 20  $\mu\text{m}$ . Experiments have been performed on 3 EPSC lines with consistent results.

d) EPSC-derived EB (embryoid bodies) immunostained for markers of the three germ layers: Alpha Fetoprotein (endoderm, top), alpha Smooth Muscle Actin (mesoderm, middle), and  $\beta$ 3Tubulin (ectoderm, bottom). Scale bar is 400  $\mu\text{m}$  (left) and 20  $\mu\text{m}$  (right). Experiments have been performed on 3 EPSC lines with consistent results.

e) Venn diagram of overlapping genes (TPM >1) from iNSC<sup>Gibco</sup> and iNSC<sup>N2B27</sup>, or neurons and from eNSC and neurons; results are expressed in percentages of genes shared or specific to each cell type.

f) Two-dimensional density plots of DNA methylation profiles (*M*-values) between iNSC<sup>Gibco</sup> and 4 different cell types: granulocyte-macrophage progenitor (GMP) (top left), Mueller cells (bottom left), hematopoietic stem cells (HSC) (top right) and megakaryocyte/erythrocyte progenitors (MEP) (bottom right). A median distribution of *M*-values has been obtained for each cell type across replicas before performing Spearman's correlation. The  $R^2$  value is shown for each plot. (e/i/r) NSC: (endogenous/induced/reference) Neural Stem Cells; rNeurons: reference Neurons; Gibco: EPSC neural induction with Gibco commercial protocol. N2B27: EPSC neural induction with bespoke published protocol<sup>32</sup>. Syn:syngeneic. Non Syn: non syngeneic.

g) Statistical comparison between the relative abundance profiles of annotated regions, separately for methylated ( $M > 0$ ) and unmethylated ( $M < 0$ ) CpG sites. The reference cell is iNSC<sup>Gibco</sup>.  $\chi^2$  test *p* values and effect size quantify how significantly different the two profiles under examination are: low *p*-values and high effect sizes are indices of strong differences.

h) Neurospheres generated from eNSC (endogenous neural stem cells) and iNSC 3 days post seeding at single cell dilution. Scale bar is 50  $\mu\text{m}$ . Experiments have been performed on iNSC from 3 mice with consistent results.

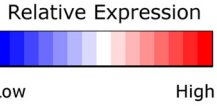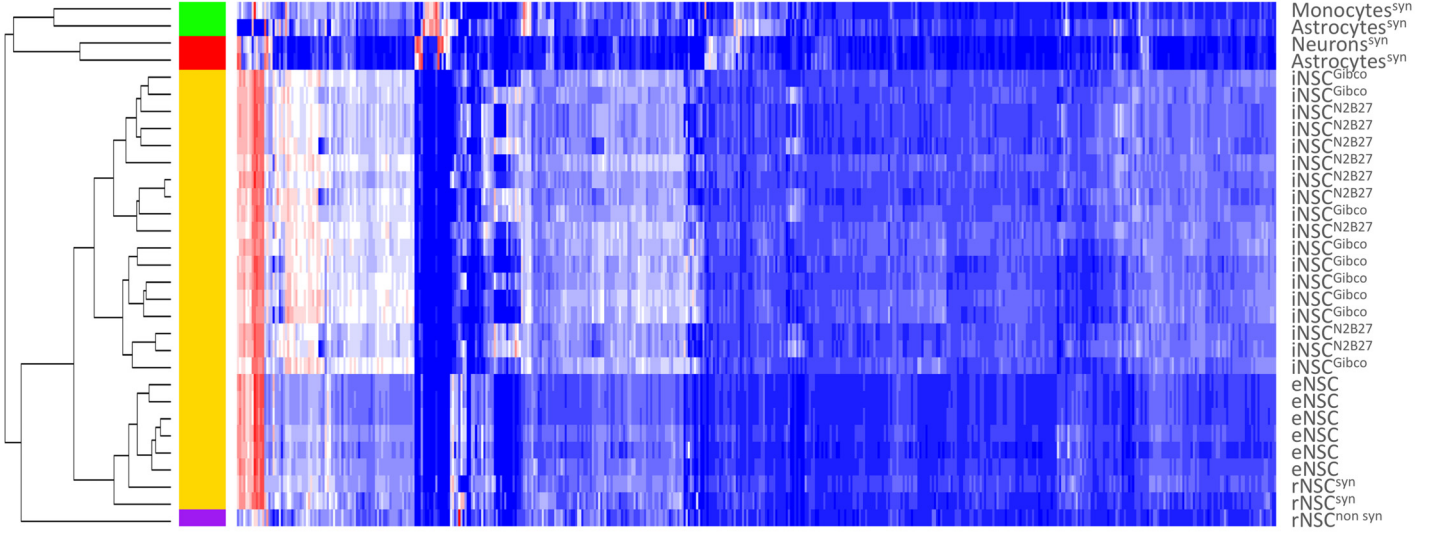

**Fig. S4: Transcriptomic analysis of EPSC-derived iNSC and endogenous syngeneic and non-syngeneic brain and non-brain cells.**

Hierarchical clustering and heatmap representing scaled gene expression from RNA sequencing of eNSC, iNSC<sup>Gibco</sup>, iNSC<sup>N2B27</sup> as well as rNSC<sup>syn</sup> and rNSC<sup>non syn</sup>, astrocytes, monocytes and neurons (top 500 genes). The dendrogram has been produced separately, with the normalized gene expression of the full list of genes. The vertical colour bar highlights the main clusters. (e/i/r)NSC: (endogenous/induced/reference) Neural Stem Cells, Gibco: EPSC neural induction with Gibco commercial protocol. N2B27: EPSC neural induction with bespoke published protocol<sup>32</sup>. Syn:syngeneic. Non Syn: non syngeneic.

a

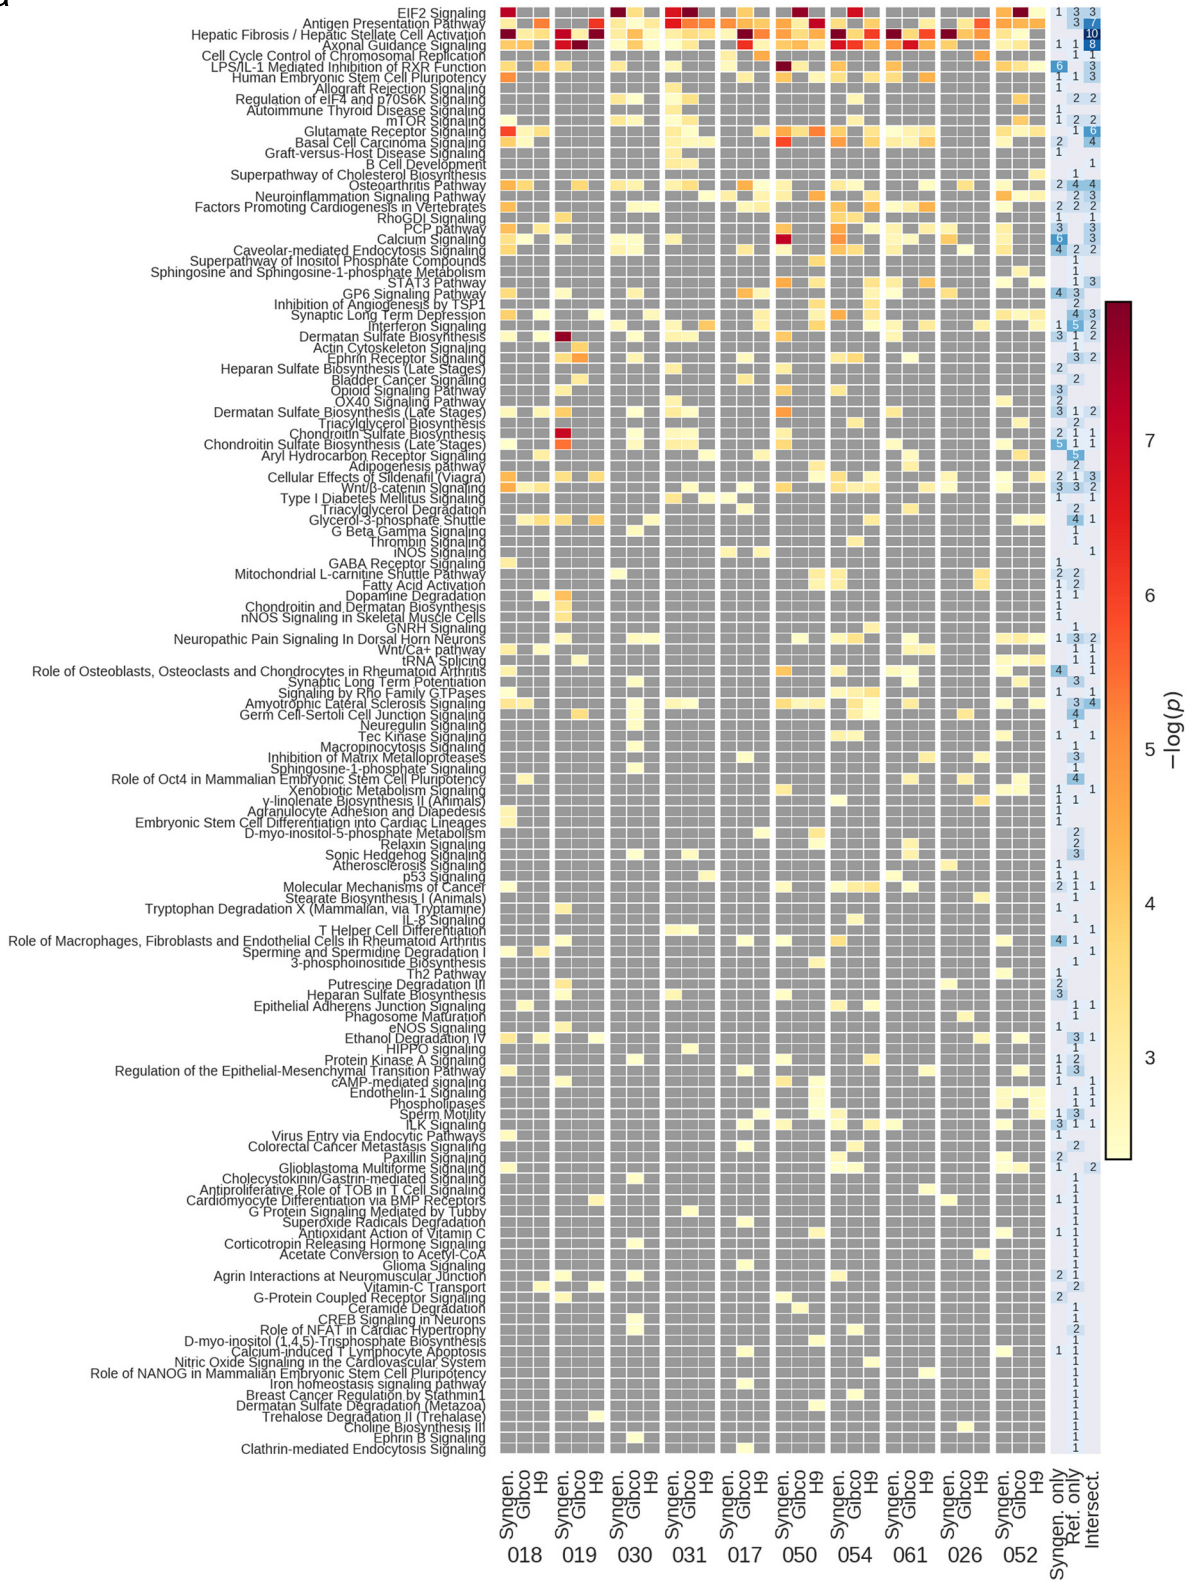

b

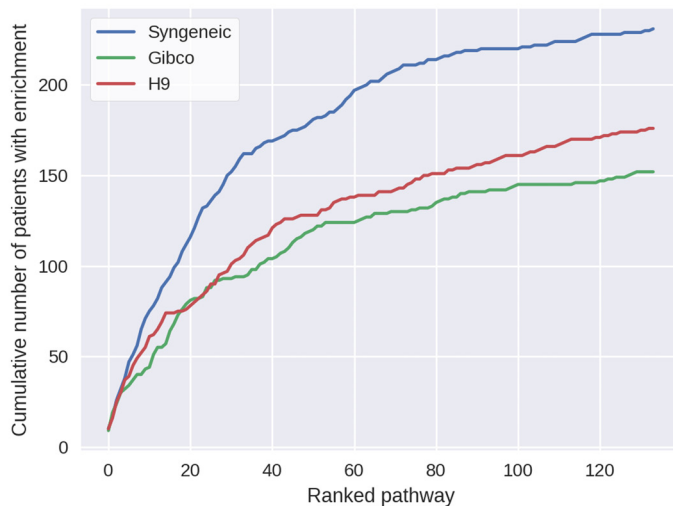

**Fig. S5: Comparative transcriptome analysis and signaling pathways deregulation between GIC, their matched-iNSC and non-syngeneic NSC.**

a) Heatmap showing the IPA pathways identified as significantly enriched in the list of Differentially Expressed (DE) genes (GIC vs iNSC) of at least one patient. Shading indicates the significance of the enrichment. For clarity, we only show results for which the uncorrected  $p$  value is less than or equal to 0.005; grey values indicate a  $p$  value above this value. For each patient, we show results for the syngeneic GIC-iNSC comparison in addition to two comparisons of the same GIC line with reference NSC lines.

b) Syngeneic DE comparisons, carried out as described in Material and Methods section, identify more enriched IPA pathways than would be obtained by comparing the same GIC line with either of the two reference NSC lines. Each pathway is summarized by the number of patients exhibiting enrichment with each of the three NSC comparators ( $p < 0.005$ ) and ranked based on the sum across all of them. This plot shows the cumulative total number of patients across the ranked pathway list for each comparator.



a

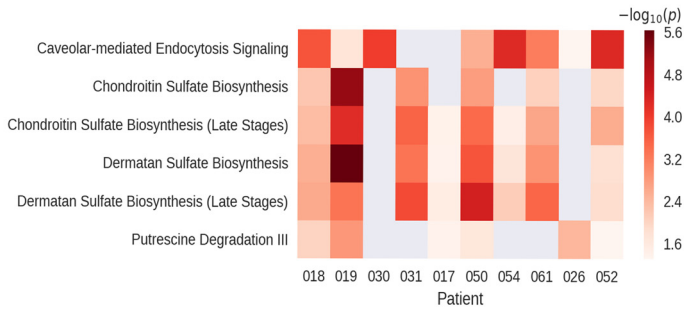

b

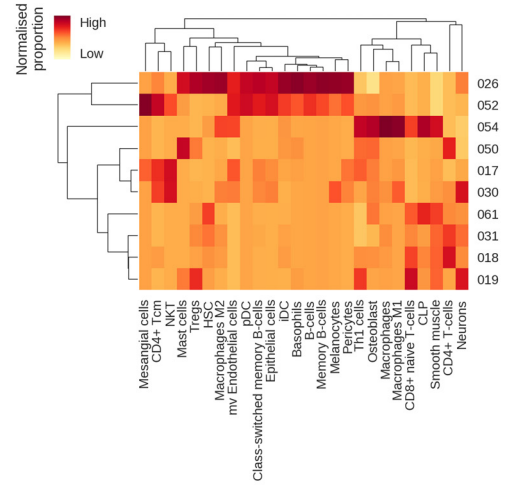

c

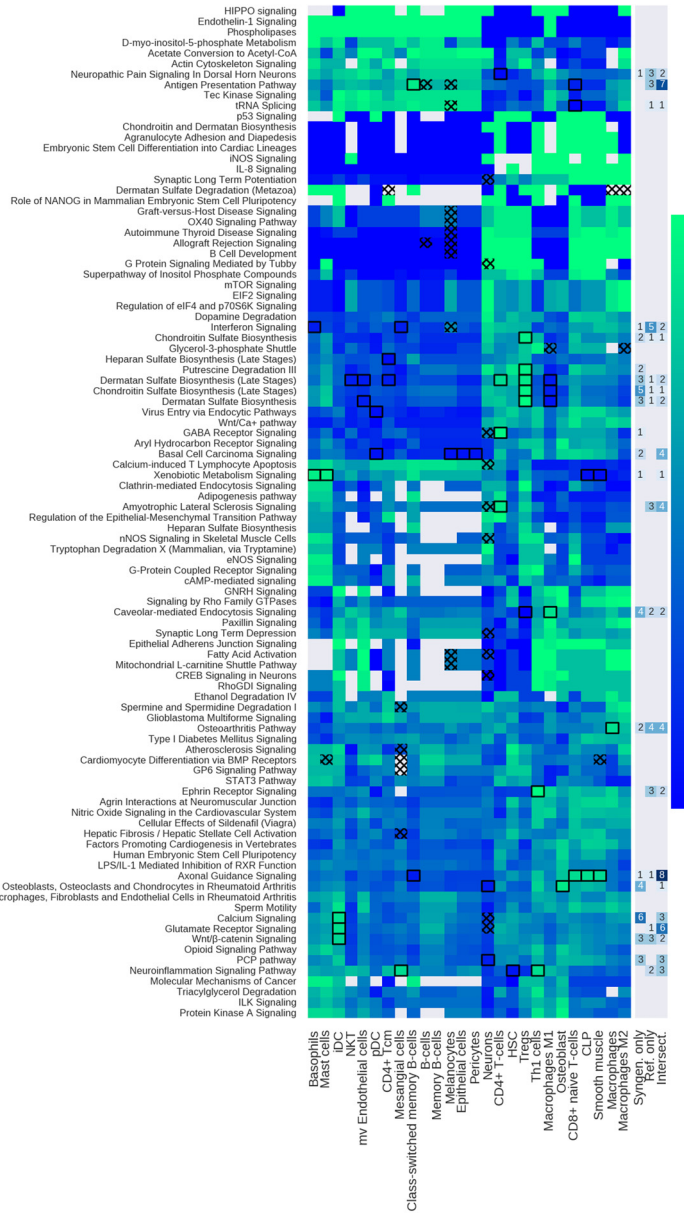

d

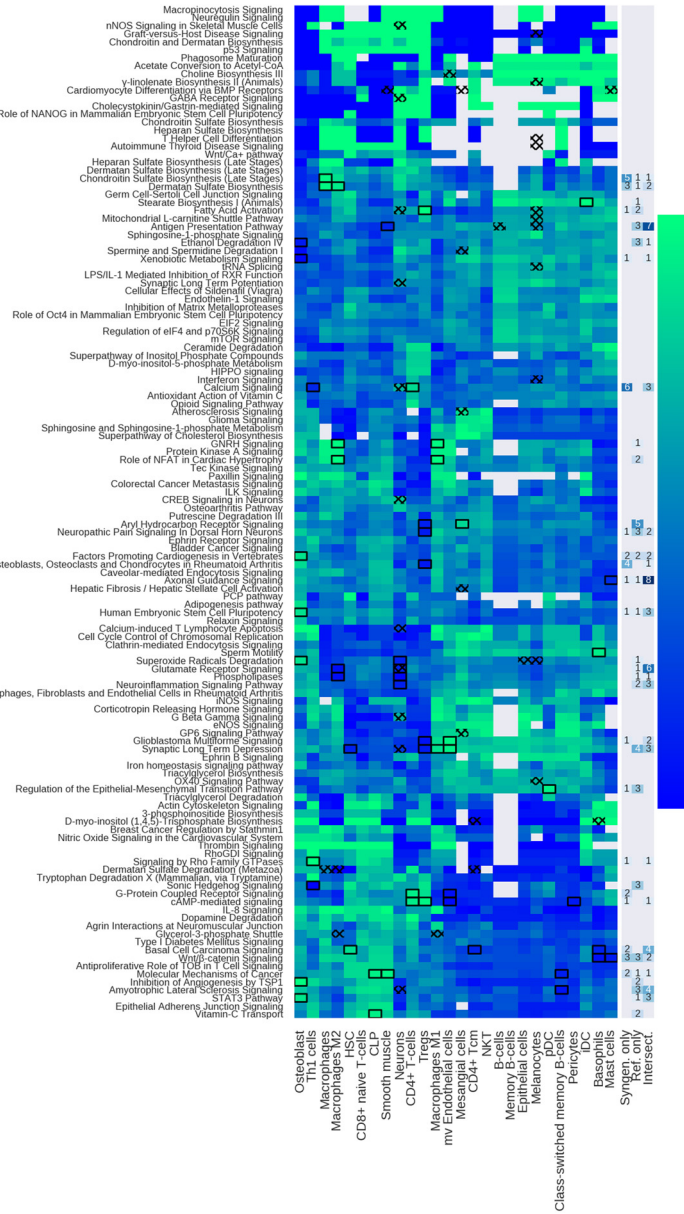



**Fig. S6: Integration of inferred cell type proportion of the tumour bulk and pathway enrichment in hGIC vs iNSC.**

a) Heatmap showing the Spearman rank correlation across patients between pathway enrichment in the GIC culture relative to matched iNSC, expressed as  $-\log_{10}(p)$ , and estimated cell type composition in the corresponding GBM bulk tissue sample (See M&M for full details). 6 pathways of interest are included. Grey shading indicates no statistical significance (unadjusted  $p$  value  $>0.05$ ).

b) Heatmap and dendrograms showing the estimated proportion of different cell types (columns) across patients (rows), normalised by column.

c) Heatmap showing the Spearman rank correlation across patients between pathway enrichment in the GIC culture relative to matched iNSC, expressed as  $-\log_{10}(p)$ , and estimated cell type composition in the corresponding GBM bulk tissue sample (see M&M for full details). Blank areas indicate pathways for which too few patients have  $p$  values defined. Highlighted cells show the combinations for which the correlation coefficient is statistically significant (unadjusted  $p$  value  $<0.05$ ). Hatched cells are those combinations in which the overlap between the cell subtype signature and the pathway genes is large. Only pathways enriched in at least one syngeneic comparison (unadjusted  $p$  value  $<0.05$ ) are shown. (Right panel) Numbers of patient comparisons exhibiting a statistically significant enrichment (unadjusted  $p$  value  $<0.005$ ) in the syngeneic and reference DE comparisons. Results correspond to regions on a Venn diagram (left to right: only in the syngeneic comparison, only in the reference comparison, in both).

d) As for (c), but selecting pathways enriched in at least one reference comparison (unadjusted  $p$  value  $<0.05$ ).

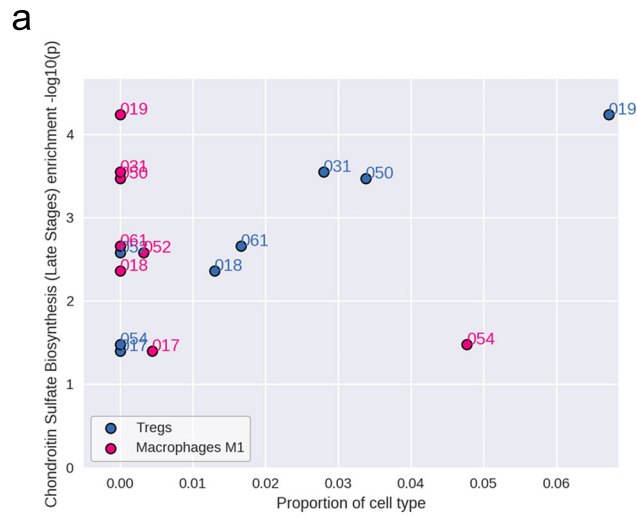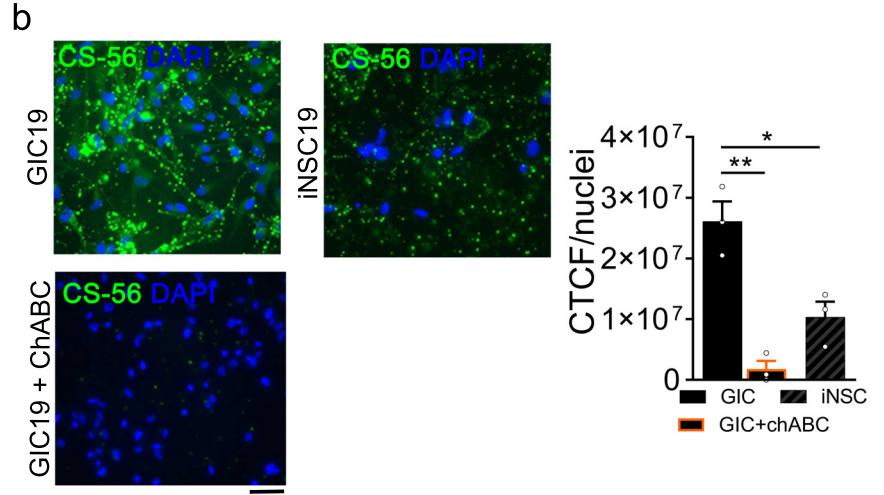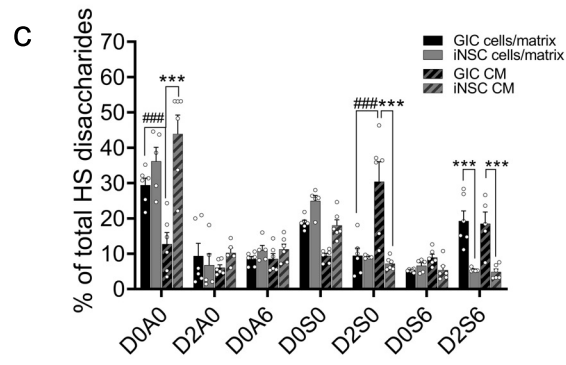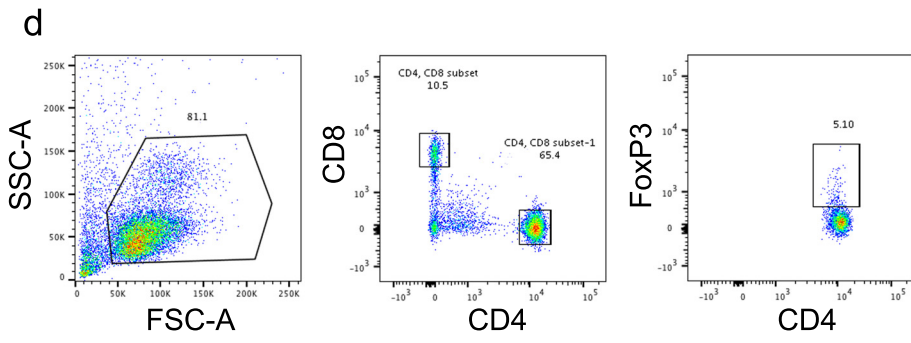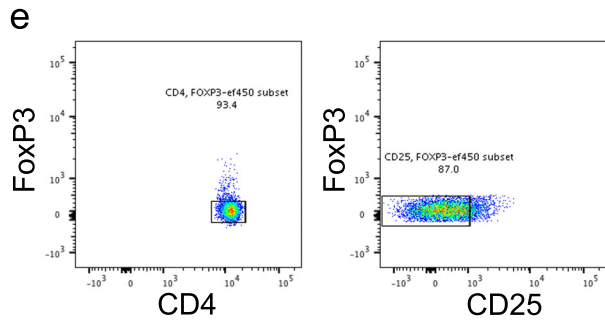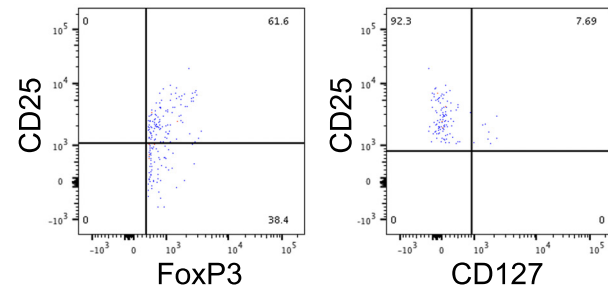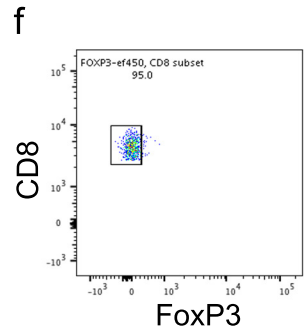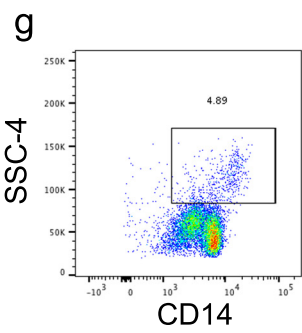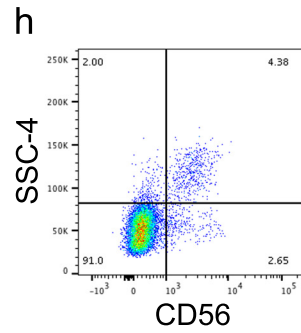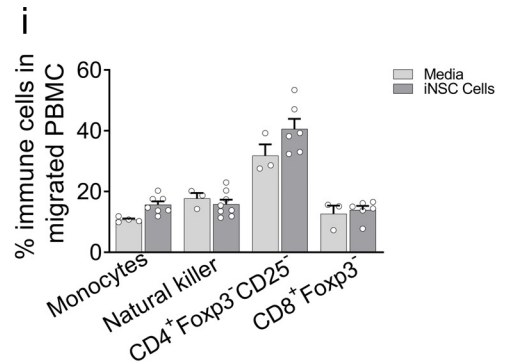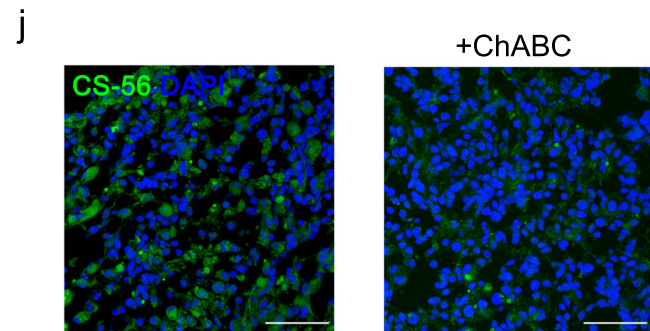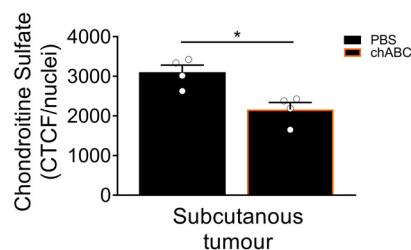

**Fig. S7: GAG analysis and modulation of immune cells migration by GIC as compared to iNSC.**

a) Scatterplot showing the correlation between estimated cell type proportion in bulk GBM tissue (from FFPE blocks) and the extent to which the Differentially Expressed (DE) genes in the GIC vs iNSC comparison are enriched for the IPA pathway 'Chondroitin Sulfate Biosynthesis (Late Stages)'. Two different cell types are shown for which the correlation is statistically significant (Fig.S6C).

b) Representative images of Chondroitin Sulfate (CS) immunostaining (clone CS-56) in GIC19, GIC19+chondroitinase ABC (chABC) treatment and iNSC19 and quantification. Results are expressed in CTCF (Corrected Total Cell Fluorescence). Scale bar is 20 $\mu$ m. Results are an average from two patients 19 and 31 (n=2, chABC treatment experiments have been repeated 3 times, one-way ANOVA, *p* value ((GIC vs chABC)=0,0012, *p* value (GIC vs iNSC)=0,0105).

c) Disaccharide composition of Heparan Sulfate (HS) isolated from GIC (black bars) and iNSC (grey bars) cell extracts (plain bars) and from conditioned media (hatched bars) analysed by RP-HPLC. D0A0: HexA-GlcNAc; D2A0: HexA(2S)-GlcNAc; D0A6: HexA-GlcNAc(6S); D0S0: HexA-GlcNS; D2S0: HexA(2S)-GlcNS; D0S6, HexA-GlcNS(6S); D2S6: HexA(2S)-GlcNS(6S). Results are an average of two GIC/iNSC pairs, 19 and 31, experiment has been repeated 3 times, two-way ANOVA, D0A0: *p* value (GIC cells/matrix vs GIC CM)<0,0001, *p* value (GIC CM vs GIC CM)<0,0001; D2S0: *p* value (GIC cells/matrix vs GIC CM)<0,0001, *p* value (GIC CM vs GIC CM)<0,0001; D2S6: *p* value (GIC cells/matrix vs iNSC cells/matrix)=0,0006, *p* value (GIC CM vs iNSC CM)=0,0007.

d-h) Flow cytometry plots representing gating to assess percentage of Tregs (CD4<sup>+</sup>CD8<sup>-</sup>Foxp3<sup>+</sup>CD25<sup>+</sup>CD127<sup>-</sup>) (D), CD4<sup>+</sup>Foxp3<sup>-</sup>CD25<sup>-</sup> (E) and CD8<sup>+</sup>Foxp3<sup>-</sup> (F) T cells, monocytes (CD14<sup>+</sup>) (G) natural killer cells (CD56<sup>+</sup>) (H) in the Peripheral Blood Mononuclear Cell (PBMC) migrated population of Figure3 E-F.

i) Percentages of migrated PBMC immune cells monocytes (CD14<sup>+</sup>), natural killer (CD56<sup>+</sup>), CD4<sup>+</sup>Foxp3<sup>-</sup>Cd25<sup>-</sup> and CD8<sup>+</sup>Foxp3<sup>-</sup> T cells in presence of media only (light grey bars) or iNSC (dark grey bars) after 4 hours incubation. Results are an average from two patients 19 and 31 (n=2, 4 technical replicas, repeated 4 independent times, one-way ANOVA, *p* value (Monocytes)=0,7011, *p* value (CD4<sup>+</sup>Foxp3<sup>-</sup>CD25<sup>-</sup>)=0,1814.

j) Representative images of CS immunostaining in subcutaneous GIC19-derived xenografts treated with vehicle or chABC and quantification. Results are expressed in CTCF (Corrected Total Cell Fluorescence). Scale bar is 50 $\mu$ m. N=4 tumours per condition, two tailed t test, *p* value=0,0101.

All graphs report mean  $\pm$ SEM. Statistical significance for all panels \**p*≤0.05, \*\**p*≤0.01, \*\*\**p*≤0.001.

Source data are provided in the source data file.

a

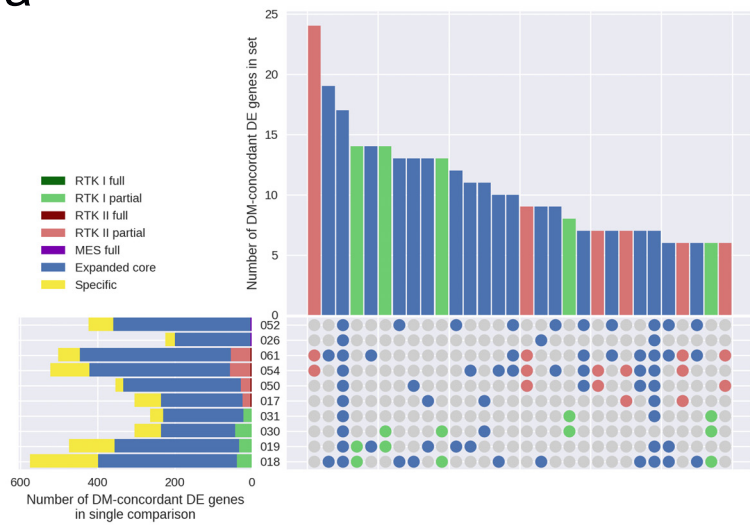

b

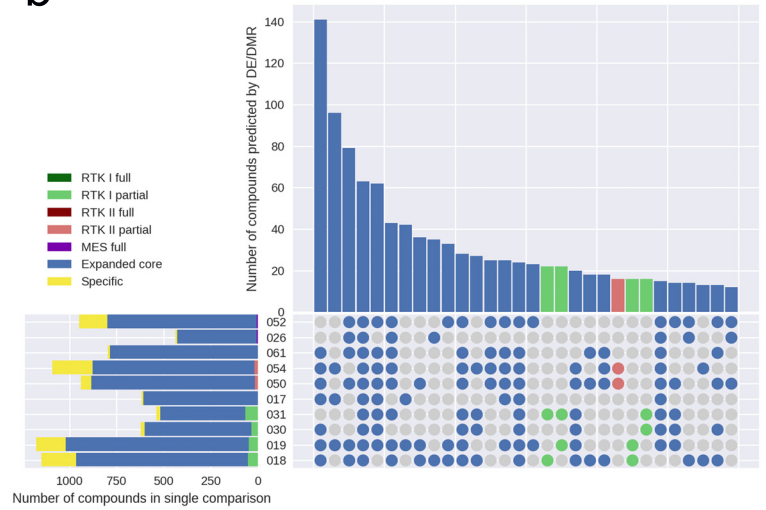

C

| Gene      | <i>PTGER4</i>     | <i>NTRK2</i>      | <i>ALDH3B1</i>    |
|-----------|-------------------|-------------------|-------------------|
| Signature | High meth/Low exp | Low meth/High exp | Low meth/High exp |
| % of GICs | 34%               | 21%               | 22.50%            |

**Fig. S8: Characterisation of patient-specific drug sensitivity.**

a) Upset plot showing the number of concordant Differentially Expressed/Differentially Methylated Regions (DE/DMRs) (features) shared across different combinations of patients. The lower left panel quantifies the total number of features independently in each patient; shading highlights the proportions of these that are specific to that patient or shared only with patients from the same methylation-derived subgroup. 'Full' refers to features shared by all patients assigned to a subgroup; 'partial' refers to those shared by only some of those patients. 'Expanded core' refers to features that are identified in >1 patient line and across known subgroups. The right-hand panel quantifies the number of features in different combinations of patients, in descending order. For example, patients 54 and 61 (both in the RTK II subgroup) share 24 concordant DE/DMRs. MES: Mesenchymal. RTKI and II: Receptor Tyrosin Kinase subgroup I and II.

b) Upset plot showing the number of drug compounds identified based on the concordant DE/DMRs in each patient. The interpretation of this plot is similar to Fig.S8A.

c) Table showing proportion of GIC within the Human Glioblastoma Cell Culture (HGCC) cohort with high methylation and low expression for *PTGER4* and low methylation and high expression for *NTRK2* and *ALDH3B1* as compared to cohort averages.

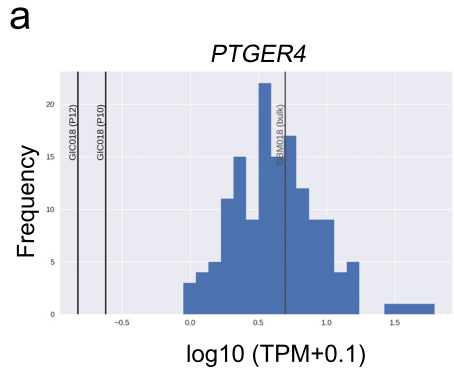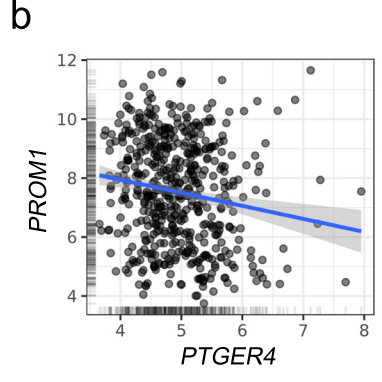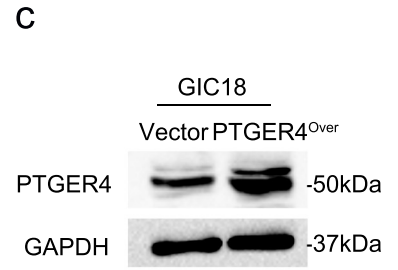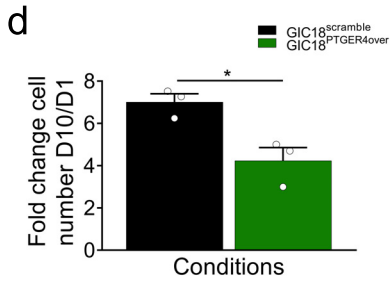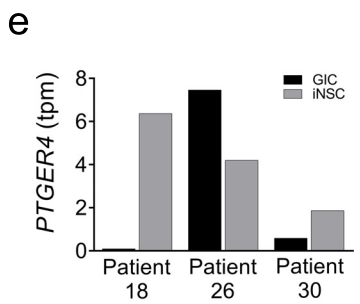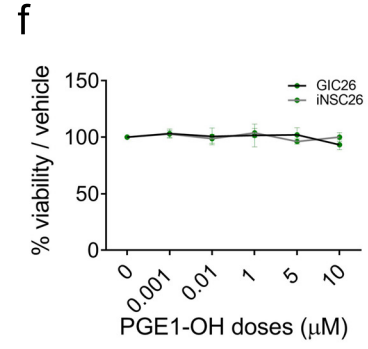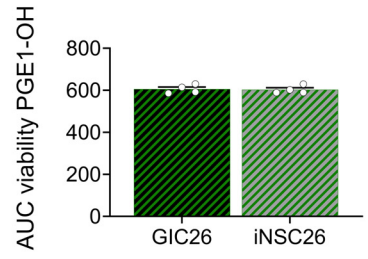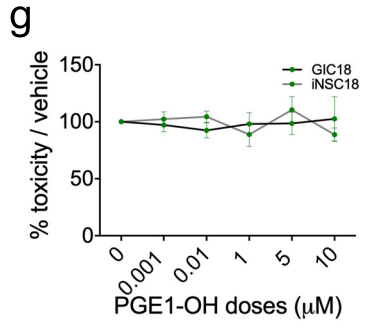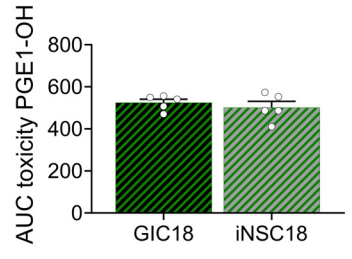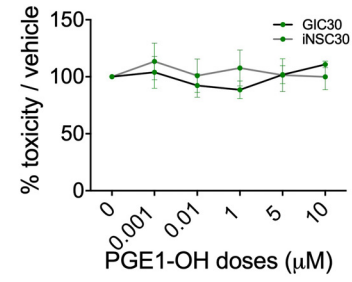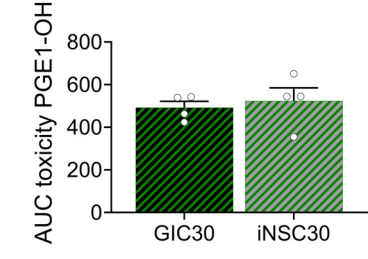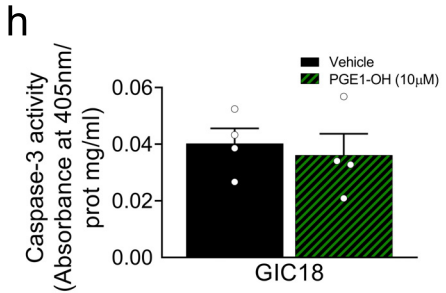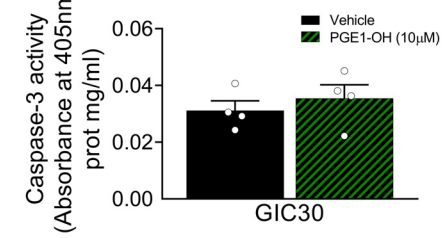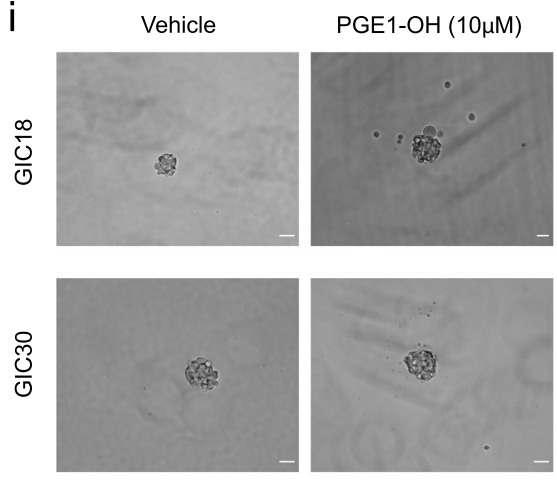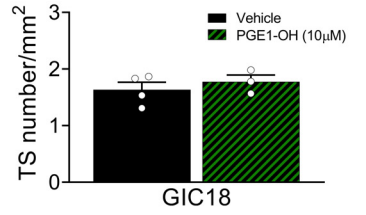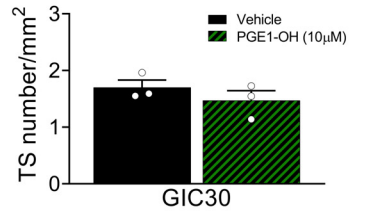

**Fig. S9: PTGER4 in GBM and GIC and characterization of PGE1-OH treatment in 2D cultures.**

a) Expression of *PTGER4* in the GIC18 line (two passages, black lines) relative to the bulk tissue (grey line) and the TCGA GBM cohort (blue histogram; includes IDH wildtype cases only).

b) Correlation analysis of *PTGER4* and *PROM1* in GBM (TCGA,  $p$ value <0.01 and correlation coefficient of -0.14 (Pearson coefficient). Obtained from <http://gliovis.bioinfo.cnio.es/>

c) Western blot showing expression level of *PTGER4* in GIC18 (scramble control) and GIC18 overexpressing *PTGER4*. GAPDH is used as housekeeping gene. Experiments have been performed 3 independent times with consistent results.

d) Proliferation assay with results represented as fold change of cell number at day 10 day 1 after plating in GIC18 transduced with empty plasmid (black dots) and *PTGER4* overexpressing plasmid (green dots) (n=3 repetition of experiment, two tailed  $t$  test,  $p$  value=0,0195).

e) mRNA expression of *PTGER4* (tpm from RNA sequencing analysis) in iNSC (grey bars) and GIC (black bars) for patient 18, 26 and 30.

f) PGE1-OH treatment of GIC (black curves) and iNSC (grey curves) of patient 26 with increasing doses (1nM to 10 $\mu$ M) (green dots). Results are represented as percentage of cell viability compared to the vehicle, measured at end point; area under the curve (AUC) was calculated from percentages of viability (n=4 times, two tailed  $t$  test,  $p$  value=0,8541).

g) PGE1-OH treatment of GIC (black curves) and iNSC (grey curves) of patient 18 (left) and 30 (right) with increasing doses (1nM to 10 $\mu$ M) (green dots). Results are represented as percentage of cytotoxicity on the vehicle, measured at end point; area under the curve (AUC) calculated from percentages of toxicity (GIC18: n=6 and GIC30: n=4 repetition of experiment, two tailed  $t$  test,  $p$  value (patient 18)=0,5091,  $p$  value (patient 30)=0,6605).

h) Apoptosis, as assessed by Caspase 3 activity, measured on vehicle (black bars) or PGE1-OH 10 $\mu$ M (green hatched pattern) treated GIC18 (top) and 30 (bottom) after 4 days of treatment (n=3,, two tailed  $t$  test,  $p$  value (patient 18)=0,6733,  $p$  value (patient 30)=0,4979).

i) Representative images of tumour spheres (TS) arising from GIC18 (top) and 30 (bottom) cultured in non-adherent condition after 4 days of treatments with vehicle (left) or PGE1-OH 10  $\mu$ M (right) (scale bar is 20 $\mu$ m) and quantification of TS number per area (right) (n=3, two tailed  $t$  test ,  $p$  value (patient 18)=0,4829 ,  $p$  value (patient 30)=0,3483).

All graphs report mean  $\pm$ SEM. Statistical significance for all panels \* $p$  $\leq$ 0.05, \*\* $p$  $\leq$ 0.01, \*\*\* $p$  $\leq$ 0.001.

Source data are provided in the source data file.



**a**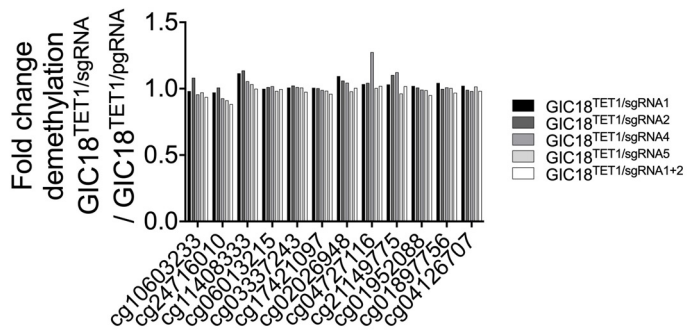**b**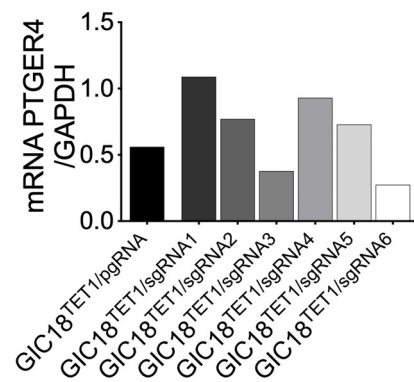**c**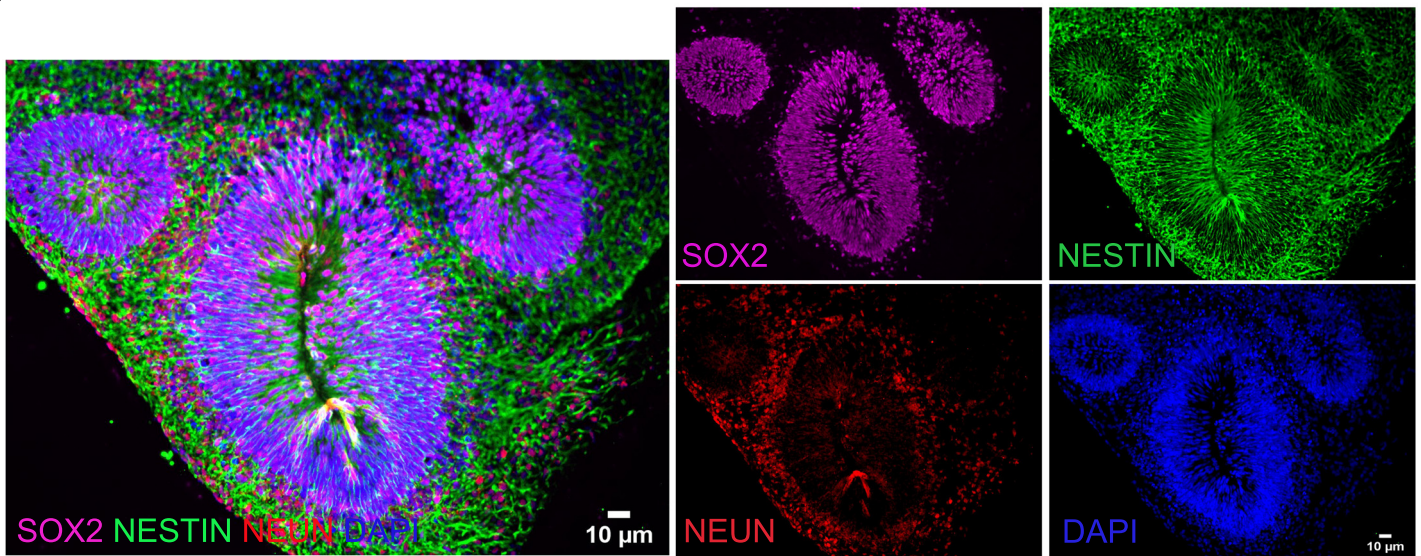**d**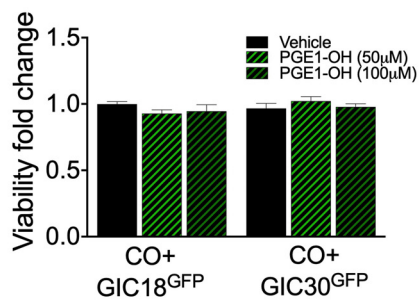**e**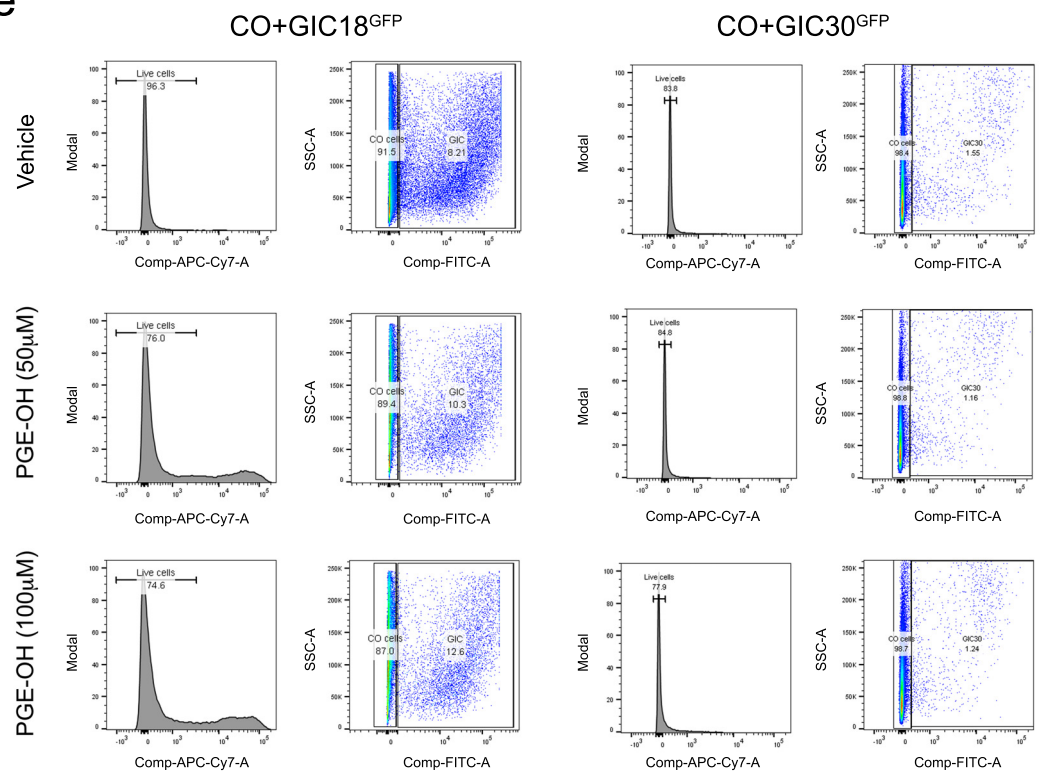



**Fig. S10: Epigenetic editing of *PTGER4* and CO characterization.**

a) Fold change demethylation of selected guides of GIC18<sup>TET1</sup> at different CpG islands within the hypermethylated region. Location of the CpG dinucleotides on the Infinium MethylationEPIC array is shown on the x axis.

b) *PTGER4* mRNA expression level in GIC18<sup>TET1/pgRNA</sup> (control line, black bar) and GIC18 infected with dCas9-*TET1* and the 6 guides RNA (grey bars).

c) Immunofluorescence staining for SOX2 (purple), NESTIN (green) and NEUN (red) in 37days old CO (representative images, DAPI is used as counterstaining). Scale bar is 10  $\mu$ m. Staining have been performed on CO derived from 2 patients with consistent results.

d) Viability of total cells of the SYNLICO model, assessed as percentages of negative cells for Zombie NIR<sup>TM</sup> after 4 days of treatment with vehicle or PGE1.OH (50 $\mu$ M, 100 $\mu$ M); COGIC18 vehicle: n=12, PGE1-OH 50 $\mu$ M : n=11, PGE1-OH 100 $\mu$ M: n=10; COGIC19 vehicle: n=9, PGE1-OH 50 $\mu$ M: n=12 and PGE1-OH: n=11 SYNLICO per group, one way ANOVA, Patient 18: *p* value (Veh vs PGE1-OH 50 $\mu$ M)=0,2596, *p* value (Veh vs PGE1-OH 100 $\mu$ M)=0,4683

e) Representative FACS plots of overall viability of the SYNLICO (Cerebral Organoids (CO)+GIC18<sup>GFP</sup>) (left) or control patient CO+GIC30<sup>GFP</sup> (right) analysed 4 days post-treatment with vehicle or PGE1-OH (50 $\mu$ M, 100 $\mu$ M) after gating for Zombie NIR<sup>TM</sup> negative cells (live cells) shown on plots as histogram of Comp-APC-Cy7-A, and total GFP population after gating for FITC, from which the GFP Mean Fluorescence Intensity (MFI) was calculated.

All graphs report mean  $\pm$ SEM. Statistical significance for all panels \**p* $\leq$ 0.05, \*\**p* $\leq$ 0.01, \*\*\**p* $\leq$ 0.001.

Source data are provided in the source data file.

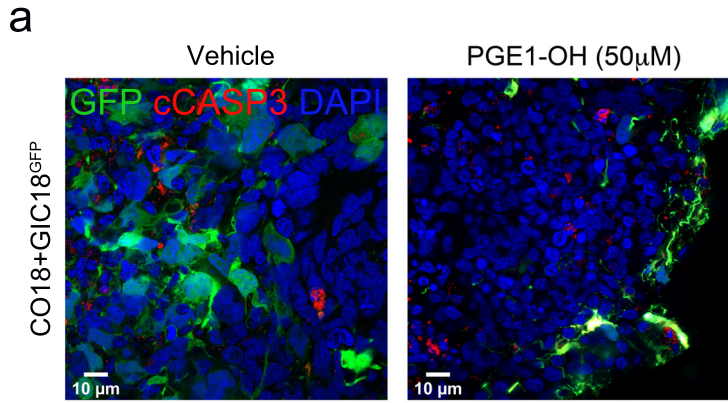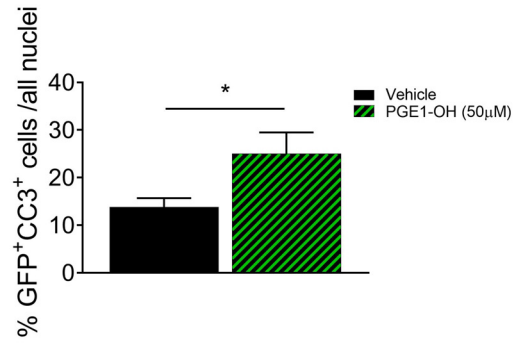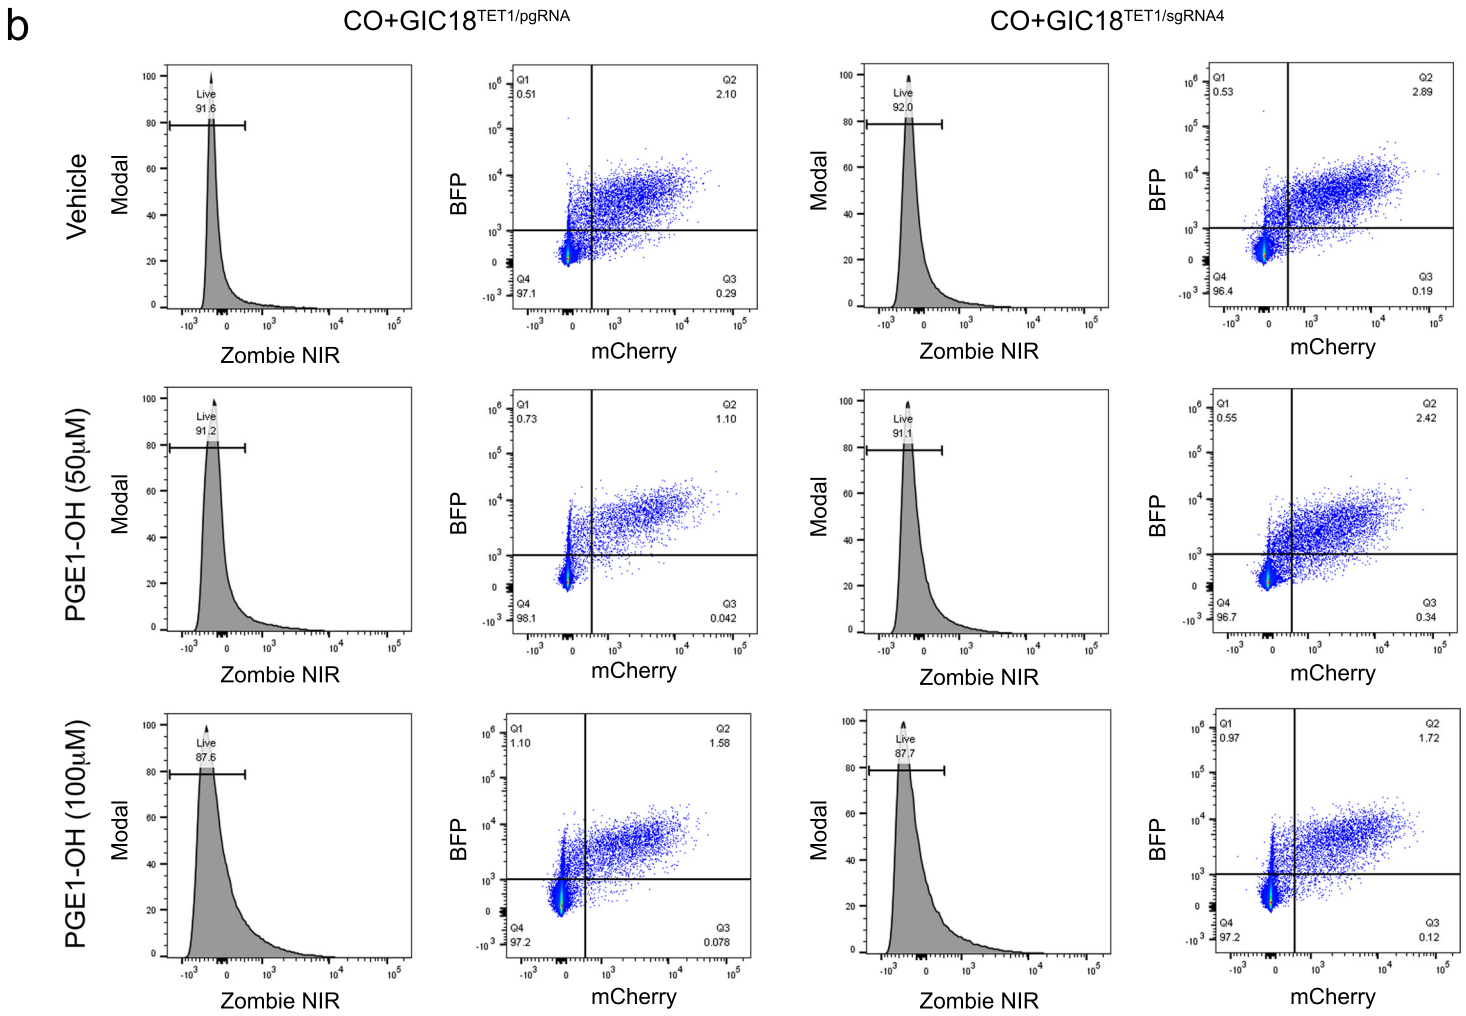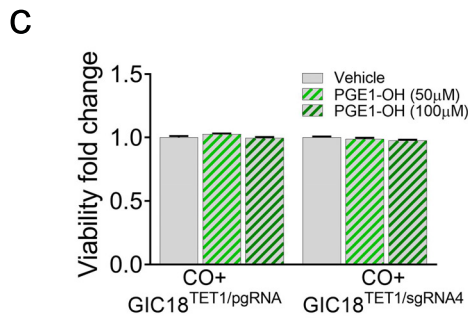

**Fig. S11: SYNLICO characterization and analysis of the effect of PGE1-OH treatment on viability and CO<sup>GFP+</sup> MFI.**

a) Representative images of GFP and cleaved Caspase 3 (cCasp3) IF of SYNLICO (Cerebral Organoids (CO)+GIC18<sup>GFP</sup>) after 4 days of treatment with vehicle or PGE1-OH (50μM). Scale bar is 10μm. Right panel shows quantification of GFP and cCasp3 double positive cells (n=3 biological replicates, Vehicle: n=14 fields, PGE1-OH 50μM: n=13 fields, two tailed *t* test, *p* value=0,0250.

b) Representative FACS plots of total COGIC18<sup>TET1/pgRNA</sup> (left) and COGIC18<sup>TET1/sgRNA4</sup> (right) processed and analysed 4 days post-treatment with vehicle or PGE1-OH (50μM, 100μM). Overall viability of the SYNLICO was assessed after gating for Zombie NIR<sup>TM</sup> negative cells (live cells) shown on plots as histogram of Comp-APC-Cy7-A. BFP/mCherry double positive cell populations were gated (Q2 population on plots), from which the MFI of BFP was calculated.

c) Viability of GIC18<sup>TET1/pgRNA</sup> and GIC18<sup>TET1/sgRNA4</sup> assessed as percentages of negative cells for Zombie NIR<sup>TM</sup> after 4 days of treatment with vehicle or PGE1-OH (50μM, 100μM); n=6 SYNLICO per group, one-way ANOVA, pgRNA: *p* value (Veh vs PGE1-OH 50μM)=0,1191, *p* value (Veh vs PGE1-OH 100μM)=0,9373, sgRNA: *p* value (Veh vs PGE1-OH 50μM)=0,6403, *p* value (Veh vs PGE1-OH 100μM)=0,1497.

All graphs report mean ±SEM. Statistical significance for all panels \**p*≤0.05, \*\**p*≤0.01, \*\*\**p*≤0.001. Source data are provided in the source data file.

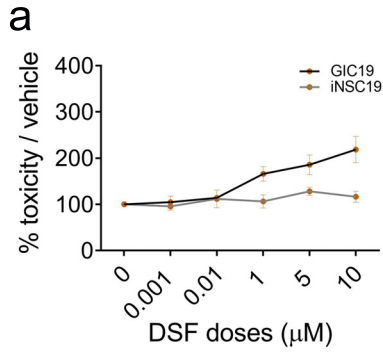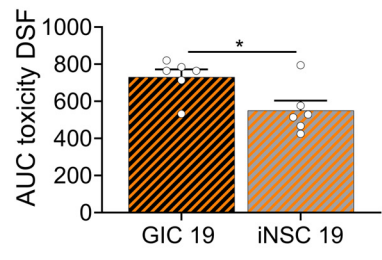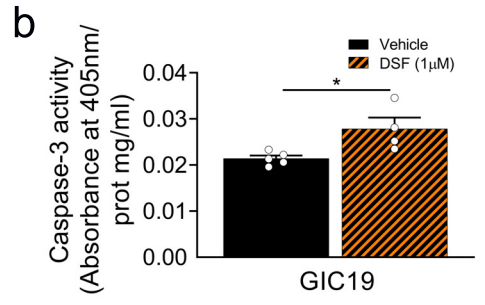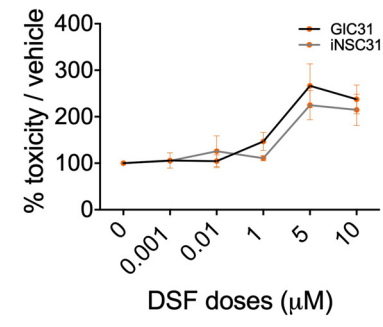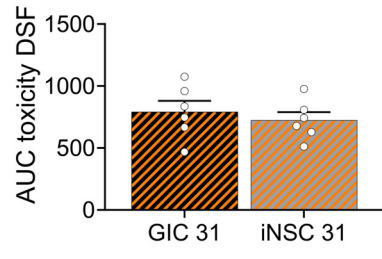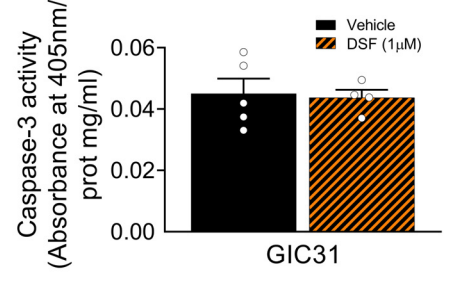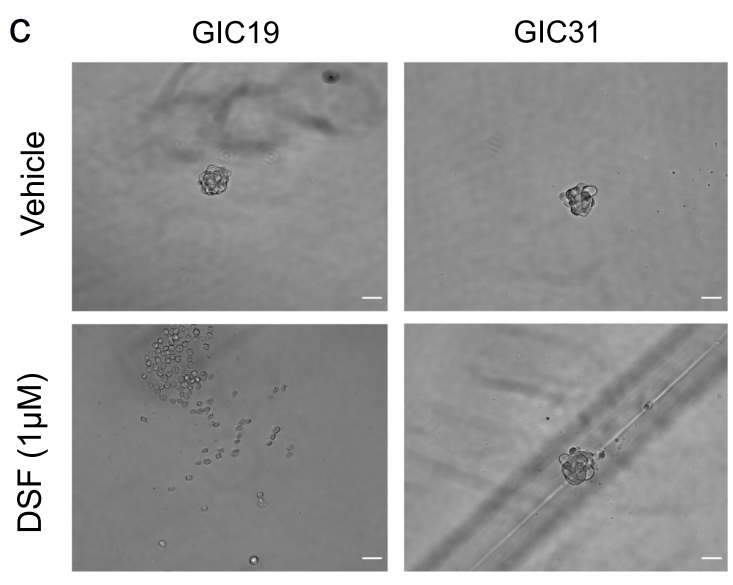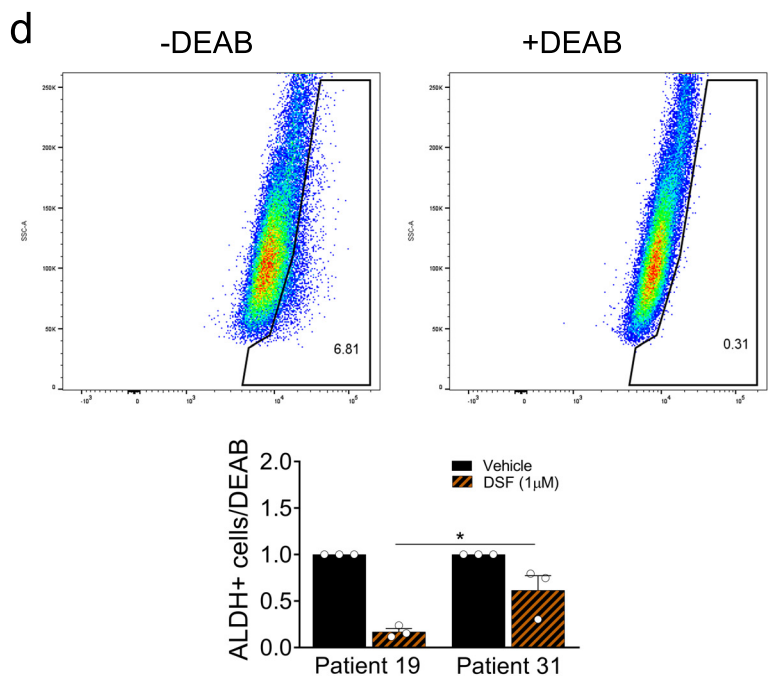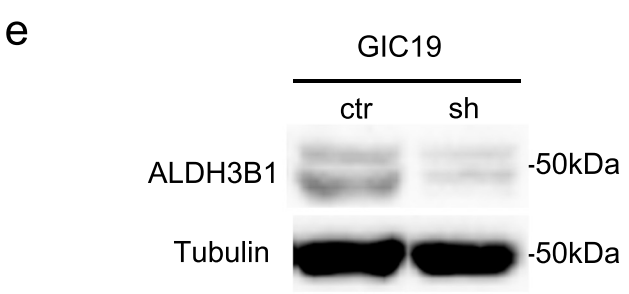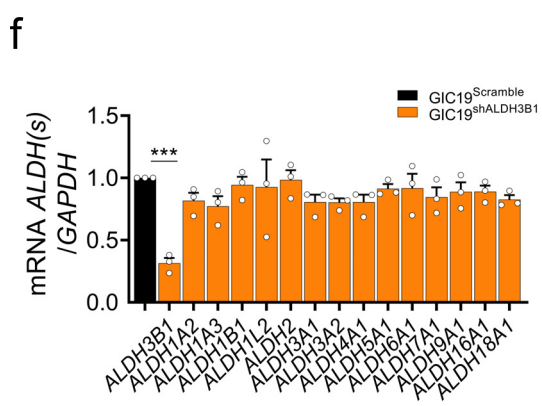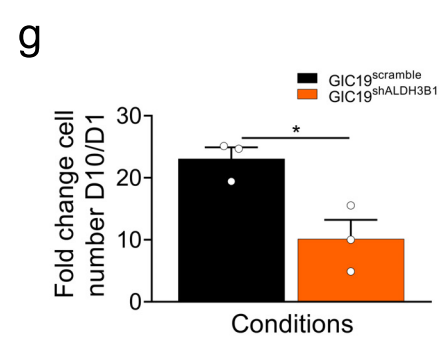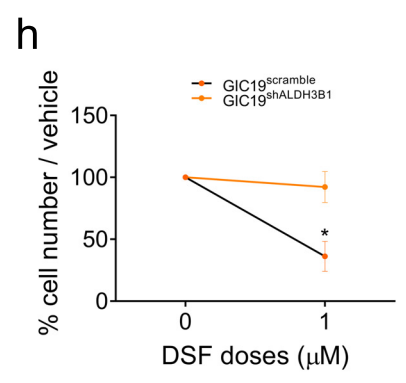

**Fig. S12: ALDH3B1/DSF treatment characterisation in 2D culture.**

a) Drug treatment on GIC (black curves) and iNSC (grey curves) of patient 19 (left) and 31 (right) with doses ranging from 1nM to 10 $\mu$ M of DSF (orange dots). Results are expressed in percentage of cytotoxicity on the vehicle and were measured at end point, area under the curve (AUC) calculated from percentages of toxicity (n=6 times, two tailed *t* test, *p* value (patient 19)=0,0247, *p* value (patient 31)=0,5496).

b) Apoptosis as assessed by Caspase 3 activity, measured after 4 days of treatment with vehicle (black bars) or DSF 1 $\mu$ M (orange hatched pattern) in GIC19 (top) and control GIC31 (bottom) (n=3 repetitions of experiment, two tailed *t* test *p* value (patient 19)=0,0247, *p* value (patient 31)=0,8313).

c) Representative images of tumour spheres (TS) arising from GIC19 (left) and 31 (right) cultured in non-adherent condition and treated with vehicle (top) or DSF 1 $\mu$ M (bottom) after 4 days of treatments. Scale bar is 20 $\mu$ m. Experiments have been performed on each line 3 independent times with consistent results.

d) Measurement of ALDH activity: FACS plots (top) showing ALDH FITC-labelled without and with ALDH inhibitor: N,N-diethylaminobenzaldehyde (DEAB). Quantification of ALDH activity (bottom) measured as difference between FITC + cells with and without DEAB after 4 days of treatment with vehicle (black bars) or DSF 1 $\mu$ M (orange hatched pattern bars) in GIC19 (left) and 31 (right). (n=2 patients, experiment was repeated 3 times, one-way ANOVA, *p* value (GIC19+DSF vs GIC 31+DSF)=0,0187).

e) Western blot analysis of ALDH3B1 upon knock-down in GIC19 (shALDH3B1) (right) as compared to control (scramble) (left), Tubulin is used as housekeeping protein. Experiments have been performed 3 independent time with consistent results.

f) mRNA expression of *ALDH* isoforms in GIC19 upon *ALDH3B1* silencing (orange bars) standardised on GAPDH expression level on expression level of GIC19 control (scramble) (black bar), n=3 independent transductions, one-way ANOVA, *p* value (*ALDH3B1*)<0,0001.

g) Proliferation assay of GIC19 scramble (black line) and sh*ALDH3B1* (orange line) with results expressed as fold change of cell number at day 10 on number of plated cells, n=3 repetitions of experiment, two tailed *t* test, *p* value=0,0226.

h) Proliferation assay of GIC19 scramble (black line) and sh*ALDH3B1* (orange line) after 4 days of treatment with DSF 1  $\mu$ M (orange dots) standardised on vehicle treated cells (n=3 repetitions of experiment, two-way ANOVA, *p* value (scramble)=0,0042, *p* value (sh*ALDH3B1*)=0,7959).

All graphs report mean  $\pm$ SEM. Statistical significance for all panels \**p* $\leq$ 0.05, \*\**p* $\leq$ 0.01, \*\*\**p* $\leq$ 0.001.

Source data are provided in the source data file.

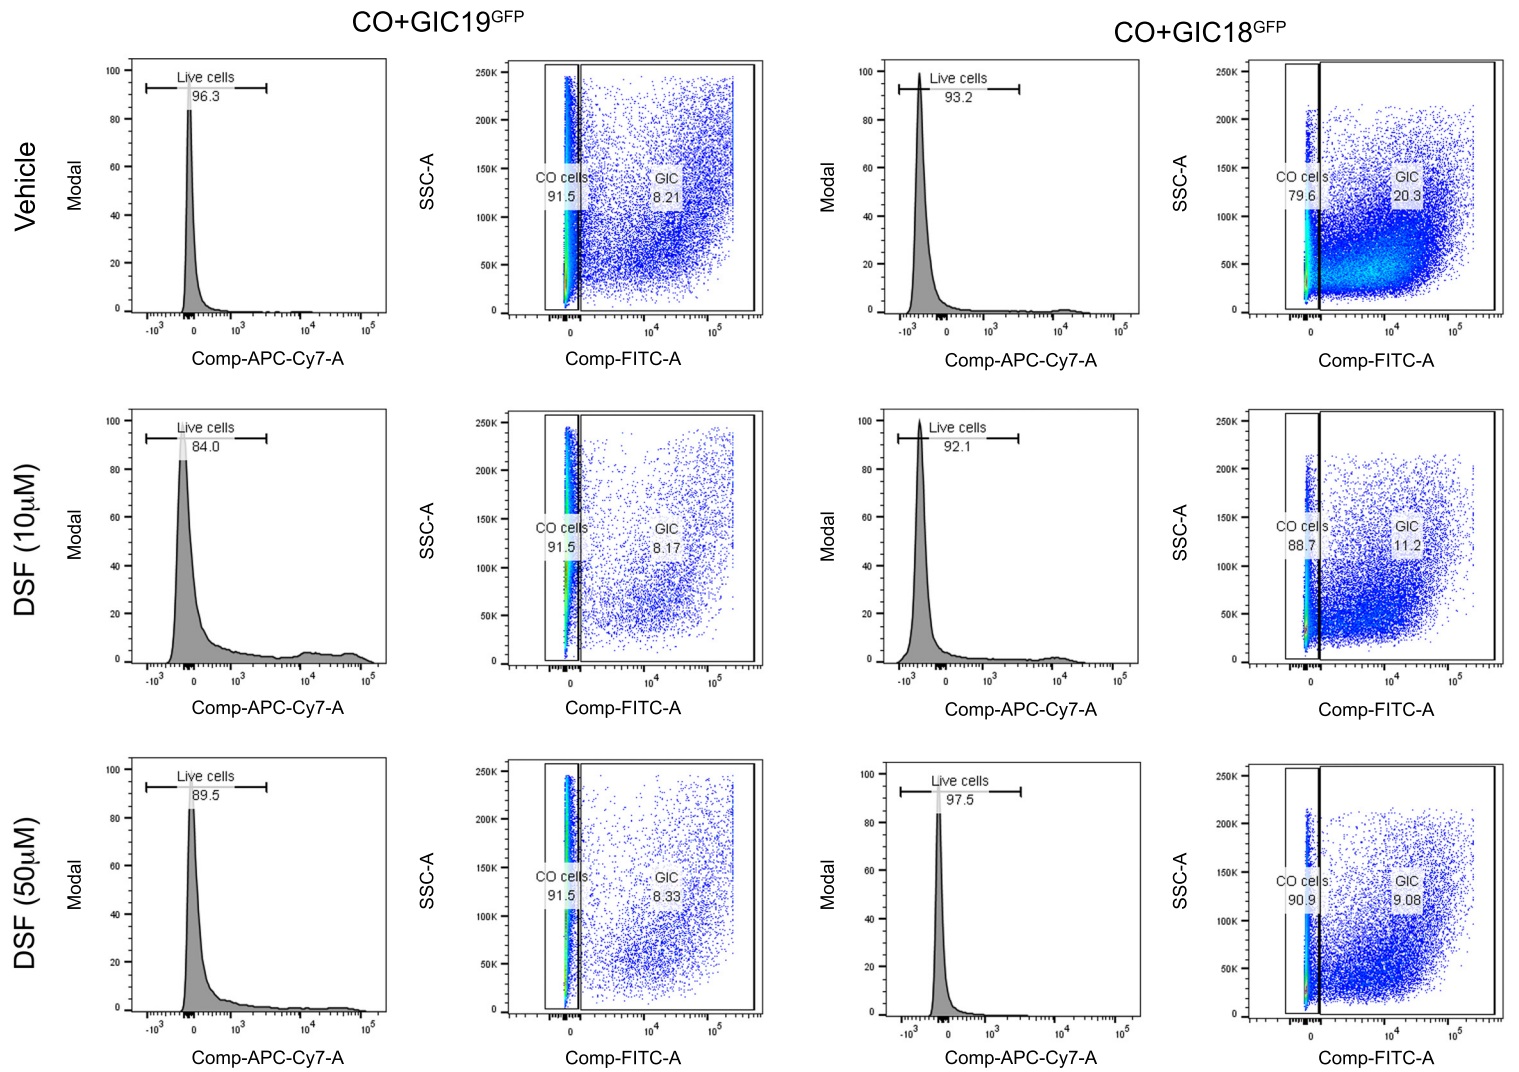

**Fig. S13: ALDH3B1/DSF treatment characterisation in syngeneic GLICO model.**

Representative FACS plots of overall viability of the organoids analysed 4 days post-treatment with vehicle or DSF (10 $\mu$ M, 50 $\mu$ M) after gating for Zombie NIR<sup>TM</sup> negative cells (live cells) shown on plots as histogram of Comp-APC-Cy7-A, and total GFP population after gating for FITC, from which the GFP MFI was calculated. Cerebral Organoids (CO)+GIC19<sup>GFP</sup>(left) and control patient: CO+GIC18<sup>GFP</sup>(right).



**a**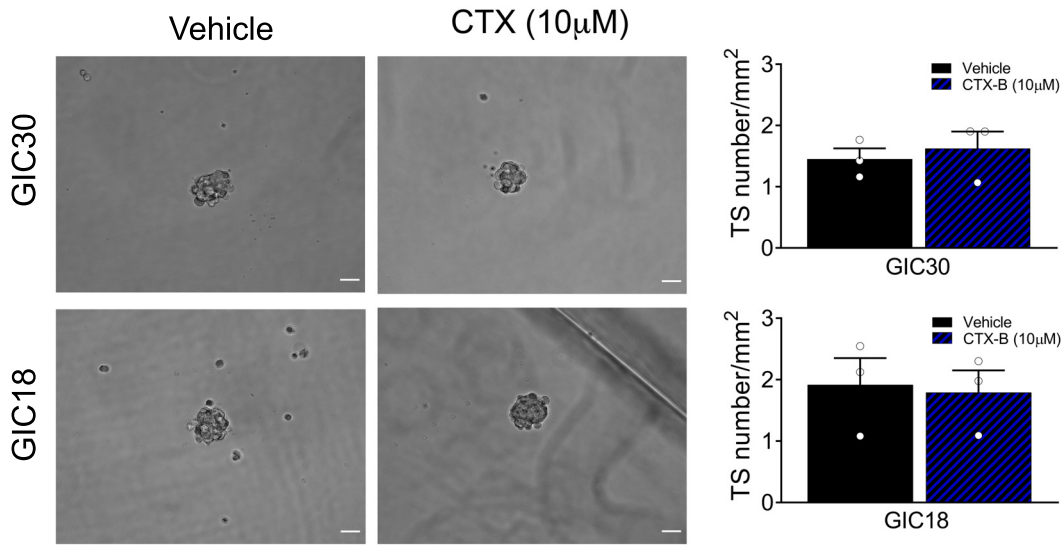**b**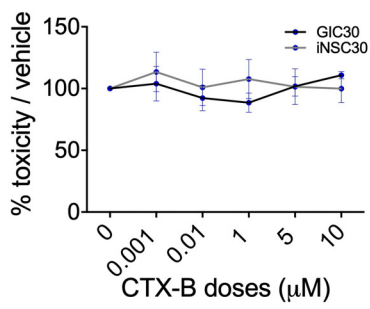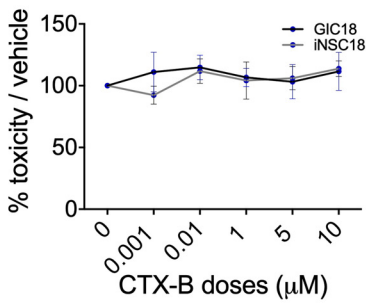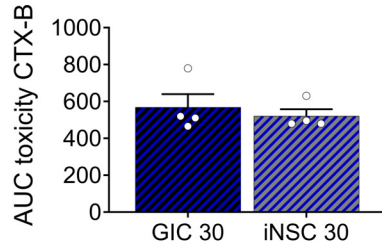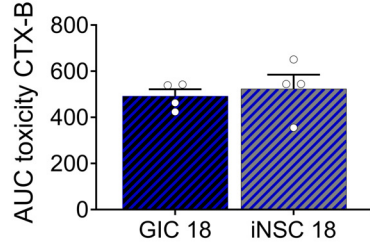**c**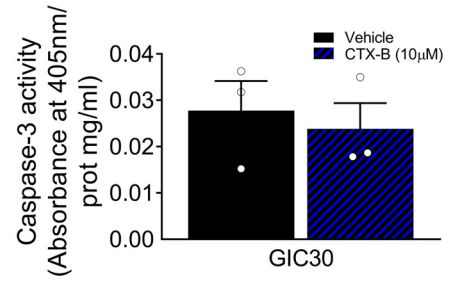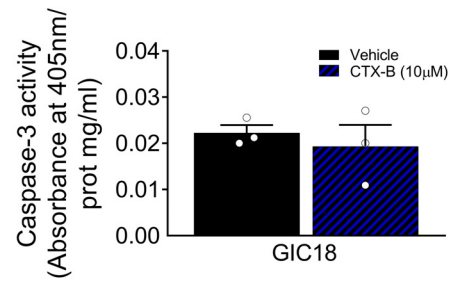**d**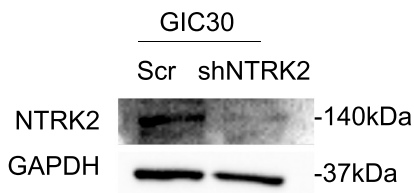**e**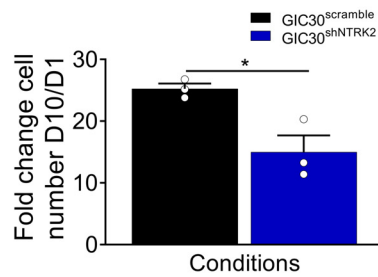**f**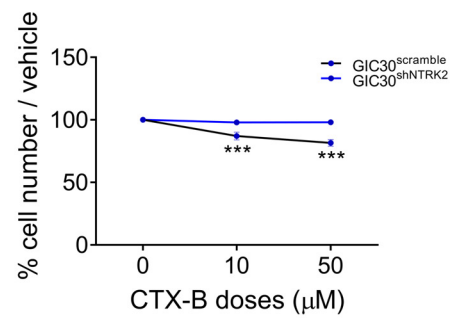



**Fig. S14: NTRK2/CTX-B characterisation in 2D culture.**

a) Representative images of tumour spheres (TS) arising from GIC30 (top) and 18 (bottom) cultured in non-adherent condition and treated with vehicle (left) or CTX-B 10 $\mu$ M (right) after 4 days of treatments (left) (scale bar is 20 $\mu$ m) and quantification of TS number per area (n=3 repetitions of experiment each, two tailed *t* test, *p* value (GIC30)=0,6269, *p* value (GIC18)=0,8347. Experiments have been performed 3 independent times with consistent results.

b) Drug treatment on GIC (black curves) and iNSC (grey curves) of patient 30 (left) and 18 (middle) with a range of doses from 1nM to 10 $\mu$ M of CTX-B (blue dots). Results are expressed in percentage of cytotoxicity on the vehicle and were measured at end point, area under the curve (AUC) was calculated from percentages of toxicity (n=4 repetitions of experiment, two tailed *t* test, *p* value (GIC30)=0,5754, *p* value (GIC18)=0,6605).

c) Apoptosis as assessed by Caspase 3 activity, was measured after 4 days of treatment with vehicle (black bars) or CTX-B 10 $\mu$ M (blue hatched pattern) in GIC30 (top) and 18 (bottom) (n=3 repetitions of experiment, two tailed, *p* value (GIC30)=0,6675, *p* value (GIC18)=0,5849).

d) Western blot analysis of NTRK2 expression in GIC30 scramble and GIC30 upon silencing (shNTRK2). GAPDH is used as housekeeping protein.

e) Proliferation assay of GIC30 scramble (black bar) and shNTRK2 (blue bar) with results expressed in fold change of cell number at day 10 on cells number at D1 (n=3 repetitions of experiment, two tailed *t* test, *p* value=0,0227).

f) Proliferation assay of GIC30 scramble (black line) and shNTRK2 (blue line) after 4 days of treatment with CTX-B 10 $\mu$ M (blue dots) standardised on vehicle treated cells (n=3 repetitions of experiment, two-way ANOVA, Scramble: *p* value (10 $\mu$ M)<0,0001, *p* value (50 $\mu$ M)<0,0001; shNTRK2 *p* value (10 $\mu$ M)=0,6011, *p* value (50 $\mu$ M)=0,7658).

All graphs report mean  $\pm$ SEM. Statistical significance for all panels \**p*≤0.05, \*\**p*≤0.01, \*\*\**p*≤0.001.

Source data are provided in the source data file.

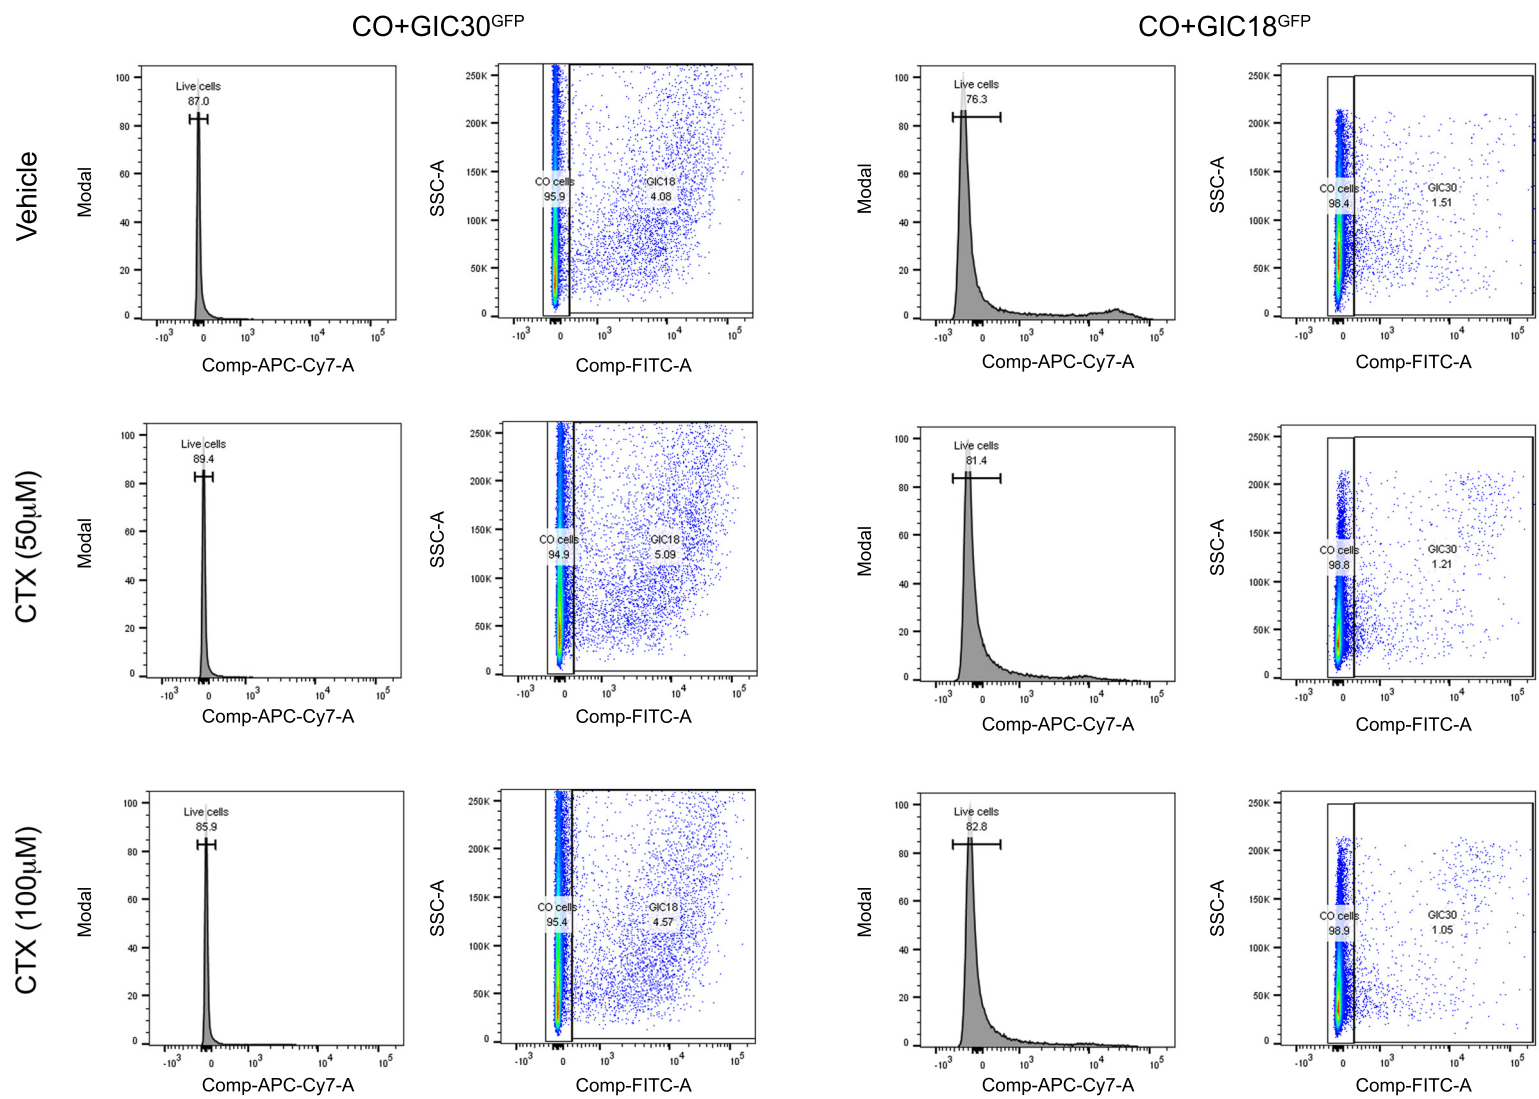

**Fig.S15 *NTRK2/CTX-B treatment characterisation in SYNGLICO***

Representative FACS plots of overall viability of the SYNGLICO (Cerebral Organoids (CO)+GIC<sup>GFP</sup>) 4 days post-treatment with vehicle or CTX-B (50 $\mu$ M, 100 $\mu$ M) after gating for Zombie NIR<sup>TM</sup> negative cells (live cells) shown on plots as histogram of Comp-APC-Cy7-A, and total GFP population after gating for FITC, from which the GFP MFI was calculated. CO+GIC30<sup>GFP</sup> (left) and control patient: CO+GIC18<sup>GFP</sup> (right).

a

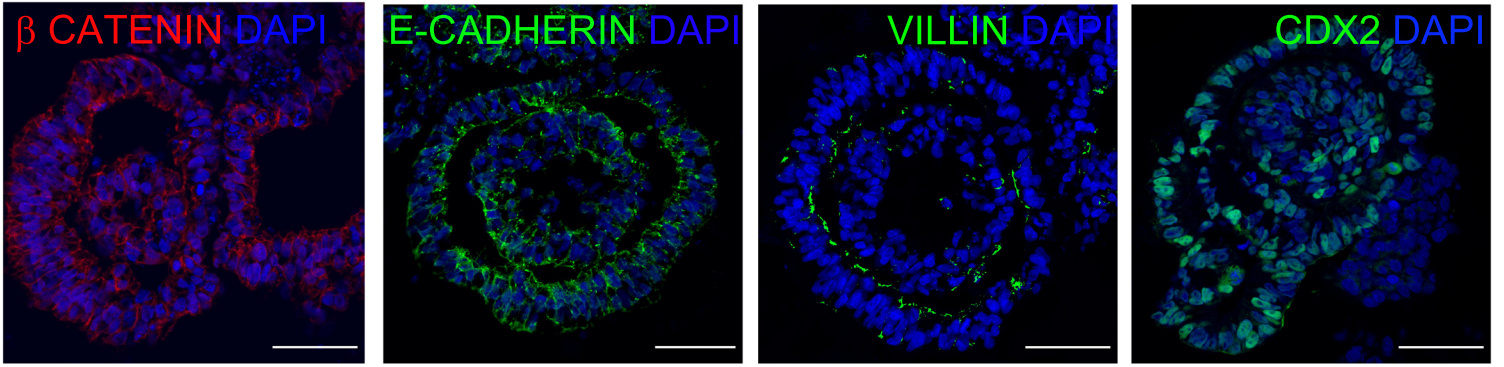

b

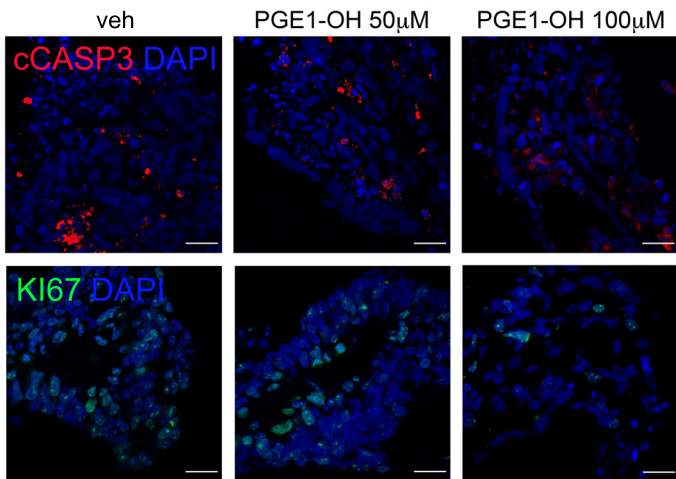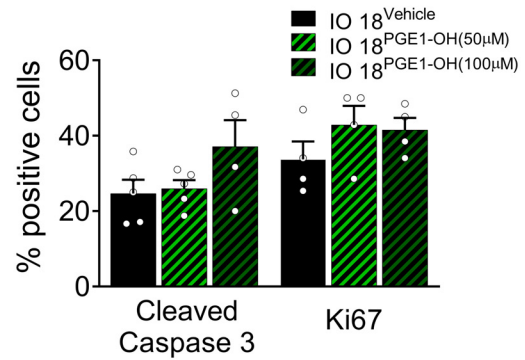

c

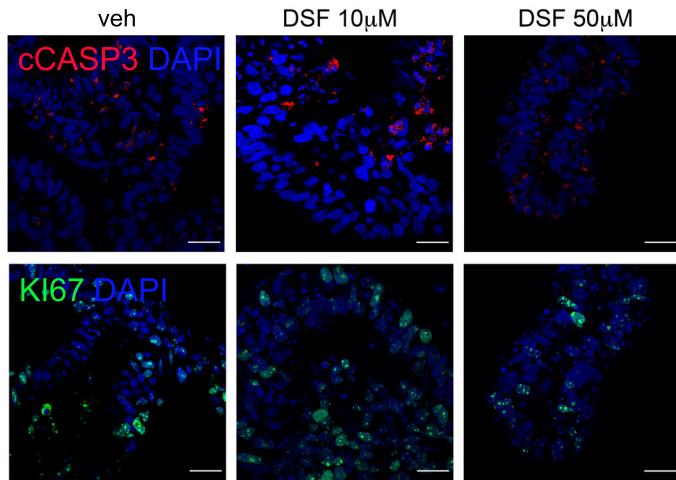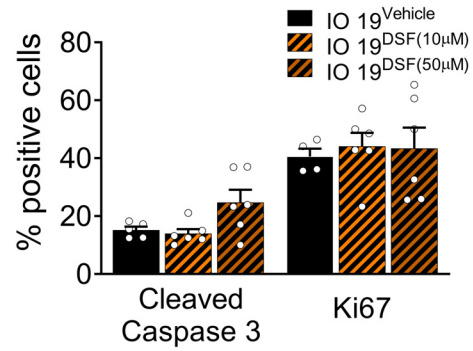

d

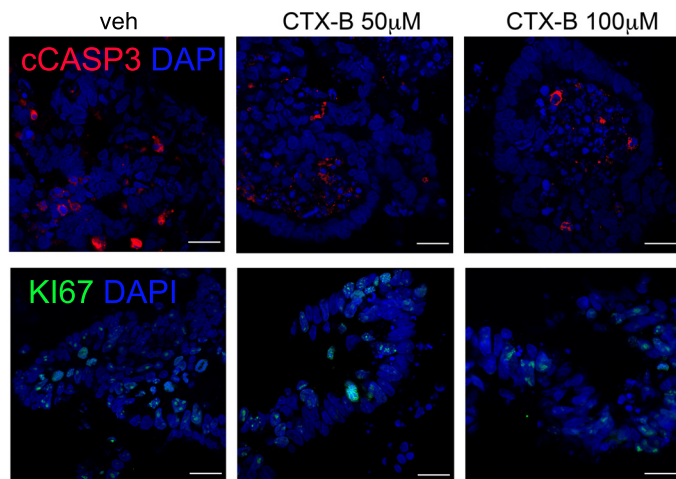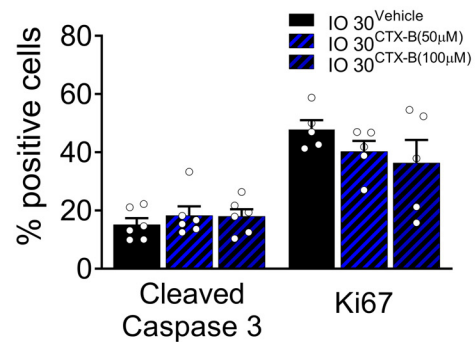

**Fig. S16 Gastro-intestinal drug toxicity assay in patient-specific EPSC derived intestinal organoids.**

a) Representative images of EPSC-derived intestinal organoids (SYNIO) immunostained for  $\beta$  CATENIN, E-CADHERIN, VILLIN and CDX2 (from left to right), nuclei were counterstained with DAPI. Scale bar is 50 $\mu$ m. Experiments have been performed on 3 IO (from patient 18, 19 and 30) with consistent results.

b-d) Representative images of EPSC-derived intestinal organoids (SYNIO) from patient 30 (b), 19 (c) and 30 (d) stained with cleaved caspase 3 (aCasp3) (top) or Ki67 (bottom) after 4 days of treatment with vehicle or PGE1-OH (50 $\mu$ M and 100 $\mu$ M) (B), DSF (10 $\mu$ M and 50 $\mu$ M) (c) and CTX-B (50 $\mu$ M and 100 $\mu$ M) (d). Quantification results (right) expressed as percentage of Ki67 or cCasp3 positive cells on the total number of cells per field (PGE1-OH treatment: Ki67 vehicle and 50 $\mu$ M n=5, all other conditions n=4; CTX-B: vehicle cCas3 n=4, vehicle Ki67 n=5, all other conditions n=6; DSF treatment: cCas3 n=5, Ki67 n=6, one-way ANOVA, b) cCasp3:  $p$  value (Veh vs 100 $\mu$ M)=0,1606, Ki67:  $p$  value (Veh vs 100 $\mu$ M)=0,4586; c) cCasp3:  $p$  value (Veh vs 50 $\mu$ M)=0,0971, Ki67:  $p$  value (Veh vs 50 $\mu$ M)=0,9444, d) cCasp3:  $p$  value (Veh vs 100 $\mu$ M)=0,7236, Ki67:  $p$  value (Veh vs 100 $\mu$ M)=0,3102.

All graphs report mean  $\pm$ SEM. Statistical significance for all panels \* $p$  $\leq$ 0.05, \*\* $p$  $\leq$ 0.01, \*\*\* $p$  $\leq$ 0.001.

Source data are provided in the source data file.
